# Supplementary material for: Scalable watermarking for identifying large language model outputs
Source: Springer Nature journal article supplement (doi:10.1038/s41586-024-08025-4), 2024-10-23
Supplement: 41586_2024_8025_MOESM1_ESM.pdf [file 41586_2024_8025_MOESM1_ESM.pdf]

---

**Supplementary information**

---

**Scalable watermarking for identifying large language model outputs**

---

In the format provided by the authors and unedited

# 1 Supplementary Information

## 2 Appendix A Scoring functions

3 In this section we first introduce some notation, then describe several scoring functions  
4 for Tournament sampling.

### 5 A.1 $g$ -value notation and masking

6 Our proposed scoring functions for Tournament sampling are computed from the  $g$ -  
7 values of the text, which provide the watermarking evidence. Specifically, recall that  
8 for multi-layer Tournament sampling (Methods Algorithm 2), we compute the  $g$ -values  
9  $g_1(x_t, r_t), \dots, g_m(x_t, r_t)$  for each of the  $m$  layers. For conciseness we will write  $g_{t,\ell} :=$   
10  $g_\ell(x_t, r_t)$  to refer to these  $g$ -values.

11 In practice, our scoring functions do not use *all* the  $g$ -values  $\{g_{t,\ell} : 1 \leq t \leq T, 1 \leq$   
12  $\ell \leq m\}$ . To reflect the masking applied during generation (Methods Section 5.6), we  
13 make two modifications: (a) we discard the  $g_{t,\ell}$  for  $t = 1, \dots, H$  due to the incom-  
14 plete context window, and (b) we discard the  $g_{t,\ell}$  for steps  $t$  where the context  
15  $x_{t-H}, \dots, x_{t-1}$  appears previously in the sequence. This means that in practice, the  
16 collection of  $g$ -values used for scoring is  $\{g_{t,\ell} : t \in \hat{T}, 1 \leq \ell \leq m\}$  for some subset  
17  $\hat{T} \subseteq \{1, \dots, T\}$ . For notational simplicity, we will write the following scoring functions  
18 assuming we use all the  $g$ -values; to obtain the masked version simply replace sums  
19 over  $t = 1, \dots, T$  with sums over  $t \in \hat{T}$  and replace  $T$  with  $|\hat{T}|$ .

### 20 A.2 Mean

Tournament sampling works by returning tokens that are more likely to have high  $g$ -  
values. Thus, the simplest scoring function is simply to take the mean  $g$ -value across  
all tokens in the text and all layers:

$$\text{MeanScore}(x) := \frac{1}{mT} \sum_{t=1}^T \sum_{\ell=1}^m g_{t,\ell}. \quad (\text{A1})$$

21 For the Bernoulli(0.5) or Uniform[0,1]  $g$ -value distributions used in our experiments,  
22 the MeanScore of a text is between 0 and 1, with an expected score of 0.5 for  
23 unwatermarked text and a larger score expected for watermarked text.

#### 24 A.2.1 Weighted Mean

In Supplementary Appendix H.4 we show that the amount of watermarking evidence  
contributed by each layer decreases as more layers are added. This motivates the  
Weighted Mean variant, which applies weights  $\alpha_1 \geq \dots \geq \alpha_m \geq 0$ , where  $\sum_{\ell=1}^m \alpha_\ell =$   
 $m$ , to the sum of the  $g$ -values:

$$\text{WeightedMeanScore}(x, \alpha) := \frac{1}{mT} \sum_{t=1}^T \sum_{\ell=1}^m \alpha_\ell g_{t,\ell}. \quad (\text{A2})$$

25 We find that for a simple linearly decreasing choice of  $\alpha$ , `WeightedMeanScore` gen-  
 26 erally outperforms `MeanScore`. Specifically, we use  $\alpha_1 = \kappa$ ,  $\alpha_2 = \kappa - \frac{\kappa-\mu}{m-1}$ ,  $\alpha_3 =$   
 27  $\kappa - 2\frac{\kappa-\mu}{m-1}, \dots, \alpha_m = \mu$  with  $\kappa = 10, \mu = 1$ , then renormalised so  $\sum_{\ell=1}^m \alpha_\ell = m$ .

### 28 A.3 Frequentist

In some cases it may be desirable to perform a hypothesis test against the null hypothesis that the text is unwatermarked; this has the advantage of providing a  $p$ -value which allows us to exactly control the false positive rate. Under the null hypothesis, each  $g_{t,\ell}$  follows the  $g$ -value distribution  $f_g$  (Methods Definition 3); furthermore if we apply repeated context masking (Supplementary Appendix A.1) then the  $g_{t,\ell}$  are independent. This allows us to compute<sup>1</sup> the  $p$ -value for the sum  $\sum_{t=1}^T \sum_{\ell=1}^m g_{t,\ell}$ :

$$p\text{-value} = 1 - \text{CDF}_{\text{Binomial}(mT, 0.5)} \left( \left[ \sum_{t=1}^T \sum_{\ell=1}^m g_{t,\ell} \right] - 1 \right) \quad \text{if } f_g = \text{Ber}(0.5) \quad (\text{A3})$$

$$p\text{-value} = 1 - \text{CDF}_{\text{Irwin-Hall}(mT)} \left( \sum_{t=1}^T \sum_{\ell=1}^m g_{t,\ell} \right) \quad \text{if } f_g = \text{Unif}[0, 1]. \quad (\text{A4})$$

29 We define `FrequentistScore`( $x$ ) to be the negative  $p$ -value and classify texts as  
 30 watermarked if the score exceeds a threshold.

31 When scoring a corpus of texts that are all exactly the same length, the Fre-  
 32 quentistScore is equivalent to the MeanScore (i.e., they should produce the same  
 33 detectability metrics); the `WeightedFrequentistScore` that follows is similarly equiva-  
 34 lent to the `WeightedMeanScore`. For simplicity therefore, in our experiments we use  
 35 the Mean versions instead of the Frequentist versions of the scores.

#### 36 A.3.1 Weighted Frequentist

Similarly to the Weighted Mean score, we can weight the evidence of the earlier layers more strongly than later layers by applying weights  $\alpha_1 \geq \dots \geq \alpha_m \geq 0$  where  $\sum_{\ell=1}^m \alpha_\ell = m$ . For this hypothesis test we use a  $Z$ -test. First, we compute the mean  $\mu$  and variance  $\sigma^2$  of the weighted sum on a single step,  $\sum_{\ell=1}^m \alpha_\ell g_{t,\ell}$ , under the null hypothesis; for example:

$$\mu = \frac{m}{2}, \quad \sigma^2 = \frac{1}{4} \sum_{\ell=1}^m \alpha_\ell^2 \quad \text{if } f_g = \text{Ber}(0.5)$$

$$\mu = \frac{m}{2}, \quad \sigma^2 = \frac{1}{12} \sum_{\ell=1}^m \alpha_\ell^2 \quad \text{if } f_g = \text{Unif}(0,1).$$

<sup>1</sup>If the Binomial or Irwin-Hall CDFs are not easily computable, we can instead use the CDF of the normal approximation; this is equivalent to the method in Supplementary Appendix A.3.1 using all weights equal to 1.

It follows that the mean of these weighted sums across all steps,  $\frac{1}{T} \sum_{t=1}^T \sum_{\ell=1}^m \alpha_{\ell} g_{t,\ell}$ , is approximated by the  $\text{Normal}(\mu, \frac{\sigma^2}{T})$  distribution. Thus we can compute a  $p$ -value:

$$p\text{-value} = 1 - \text{CDF}_{\text{Normal}(\mu, \frac{\sigma^2}{T})} \left( \frac{1}{T} \sum_{t=1}^T \sum_{\ell=1}^m \alpha_{\ell} g_{t,\ell} \right). \quad (\text{A5})$$

## 37 A.4 Bayesian

38 In this section we present a two-sided approach that (unlike the one-sided Frequentist  
39 approach which only assumes the unwatermarked  $g$ -value distribution) also uses knowl-  
40 edge of the watermarked  $g$ -value distribution, which is learned from data. Assuming we  
41 have access to a representative set of labeled watermarked and unwatermarked sam-  
42 ples for training, this approach is able to offer more information than the Frequentist  
43 approach, by considering how  $g$ -values are distributed for *both* hypotheses.

Formally, we have two hypotheses: watermarked ( $w$ ) or unwatermarked ( $\neg w$ ). We treat the watermarking hypothesis as a latent variable and the  $g$ -values  $\{g_{t,\ell}\}_{1 \leq t \leq T, 1 \leq \ell \leq m}$  as the observed evidence. The *prior*  $P(w)$  is the probability *a priori* that a piece of text is watermarked; it can be learned empirically or set to reflect a belief about the watermarked base rate. The *posterior*  $P(w|g)$  is the probability that the text is watermarked, given its  $g$ -values. The *likelihoods*  $P(g|\neg w)$  and  $P(g|w)$  are the probabilities of observing these  $g$ -values, in unwatermarked text or in watermarked text respectively. Bringing these together, we can compute the *log posterior odds*:

$$\begin{aligned} \text{LogPosteriorOdds}(x) &= \log \left( \frac{P(w|g)}{P(\neg w|g)} \right) \\ &= \log \left( \frac{P(g|w)P(w)}{P(g|\neg w)P(\neg w)} \right) \\ &= \log P(g|w) - \log P(g|\neg w) + \log P(w) - \log (1 - P(w)). \end{aligned}$$

We define the *BayesianScore* as the the watermarked posterior  $P(w|g)$ , i.e., the probability that the text  $x$  is watermarked, given its  $g$ -values. This can be computed from the log posterior odds like so:

$$\begin{aligned} \text{BayesianScore}(x) &:= P(w|g) \\ &= \sigma [\text{LogPosteriorOdds}(x)] \\ &= \sigma [\log P(g|w) - \log P(g|\neg w) + \log P(w) - \log (1 - P(w))] \quad (\text{A6}) \end{aligned}$$

44 where  $\sigma(\cdot)$  is the sigmoid function. To use the *BayesianScore* for Tournament sampling,  
45 we just need to determine the likelihoods  $P(g|\neg w)$  and  $P(g|w)$ :

**Theorem 6** (Bayesian likelihoods for multi-layer Tournament sampling). *For multi-layer Tournament sampling, the likelihoods can be factorized as:*

$$P(g|\neg w) = \prod_{t=1}^T \prod_{\ell=1}^m f_g(g_{t,\ell}) \quad (\text{A7})$$

$$P(g|w) = \prod_{t=1}^T \prod_{\ell=1}^m \sum_{c=1}^N P(g_{t,\ell}|\psi_{t,\ell} = c)P(\psi_{t,\ell} = c|g_{t,<\ell}) \quad (\text{A8})$$

where  $\psi_{t,\ell}$  is a random variable representing the number of unique tokens in a tournament match on layer  $\ell$ , on timestep  $t$ . Furthermore,  $P(g_{t,\ell}|\psi_{t,\ell} = c)$  can be written in terms of the  $g$ -value distribution  $f_g$  and  $F_g$  (Methods Definition 3):

$$P(g_{t,\ell}|\psi_{t,\ell} = c) = \begin{cases} cF_g(g_{t,\ell})^{c-1}f_g(g_{t,\ell}) & \text{if } f_g \text{ is continuous} \\ F_g(g_{t,\ell})^c - [F_g(g_{t,\ell}) - f_g(g_{t,\ell})]^c & \text{if } f_g \text{ is discrete.} \end{cases} \quad (\text{A9})$$

46 *Proof.* See Supplementary Appendix K.1. □

The factorization in Theorem 6 is based on two intuitions. First, the distribution of a watermarked  $g$ -value  $g_{t,\ell}$  can be determined exactly if we know the number of unique candidates  $\psi_{t,\ell}$  (it is given in Equation (A9)). Second, the number of unique samples  $\psi_{t,\ell}$  is dependent on the amount of entropy in the distribution on layer  $\ell$ ; and this can be predicted as a function of the lower-level  $g$ -values  $g_{t,<\ell}$  because on a high-entropy timestep  $t$ , the  $g$ -values  $g_{t,<\ell}$  are likely to be larger. Accordingly, we model the probabilities  $P(\psi_{t,\ell} = c|g_{t,<\ell})$  as learned functions of  $g_{t,<\ell}$ . Specifically, for experiments with  $N = 2$  samples, we use a logistic regression model to learn  $P(\psi_{t,\ell} = 2|g_{t,<\ell})$ :

$$P(\psi_{t,\ell} = 2|g_{t,<\ell}) = \sigma \left( \beta_\ell + \sum_{j=1}^{\ell-1} \delta_{\ell,j} g_{t,j} \right), \quad (\text{A10})$$

47 where  $\sigma(\cdot)$  is the sigmoid function,  $\beta_\ell \in \mathbb{R}$  is the bias parameter for layer  $\ell$ , and the  
48 weight  $\delta_{\ell,j} \in \mathbb{R}$  refers to the effect of  $g_{t,j}$  on the probability that  $\psi_{t,\ell} = 2$ . As  $N = 2$ ,  
49 we can then set  $P(\psi_{t,\ell} = 1|g_{t,<\ell}) = 1 - P(\psi_{t,\ell} = 2|g_{t,<\ell})$ .

50 For the non-distortionary configurations used in this work, BayesianScore has a  
51 simple form, which follows directly from Theorem 6:

**Theorem 7** (BayesianScore for  $N = 2$ , Bernoulli(0.5)  $g$ -value distribution). *If  $N = 2$  and  $f_g = \text{Bernoulli}(0.5)$ , then:*

$$\text{BayesianScore}(x) = \sigma \left( \sum_{t=1}^T \sum_{\ell=1}^m [P(\psi_{t,\ell} = 1|g_{t,<\ell}) + (g_{t,\ell} + 0.5)P(\psi_{t,\ell} = 2|g_{t,<\ell})] \right)$$

$$+ \log P(w) - \log(1 - P(w)) \Big).$$

52 *Proof.* Follows from substituting  $f_g(z) = 0.5$  and  $F_g(z) = 0.5 + 0.5z$  into Theorem 6  
 53 and Equation (A6).

**Theorem 8** (BayesianScore for  $N = 2$ , Uniform  $g$ -value distribution). *If  $N = 2$  and  $f_g = \text{Uniform}[0, 1]$ , then:*

$$\text{BayesianScore}(x) = \sigma \left( \sum_{t=1}^T \sum_{\ell=1}^m [P(\psi_{t,\ell} = 1 | g_{t,<\ell}) + 2 g_{t,\ell} P(\psi_{t,\ell} = 2 | g_{t,<\ell})] \right. \\ \left. + \log P(w) - \log(1 - P(w)) \right).$$

54 *Proof.* Follows from substituting  $f_g(z) = 1$  and  $F_g(z) = z$  into Theorem 6 and  
 55 Equation (A6).

## 56 Appendix B Related work: Generative 57 watermarking

58 In this section we discuss other generative watermarks; we divide our discussion into  
 59 sampling algorithms, random seed generators, scoring functions, and other techniques.

### 60 B.1 Sampling algorithms

61 In this section we describe existing sampling algorithms (Methods Definition 5) which  
 62 are alternatives to Tournament sampling. Our two baselines are Gumbel sampling and  
 63 Soft Red List, which we choose both for their prevalence in the literature and their  
 64 high performance relative to other methods [21, 37]. We give detailed descriptions of  
 65 our baselines, then discuss some other sampling algorithms.

#### 66 B.1.1 Baseline: Gumbel (aka Exponential minimum) sampling

In general, the *Gumbel trick* [38] is a method to take a sample  $x^*$  from any categorical probability distribution  $p(x_1), \dots, p(x_V)$  by adding i.i.d. samples  $G_1, \dots, G_V$  from the Gumbel(0,1) distribution to the log probabilities:

$$x^* := \arg \max_{1 \leq i \leq V} [\log p(x_i) + G_i].$$

It can be shown that  $\mathbb{P}(x^* = x_i) = p(x_i)$  for all  $i$ . It is also true that the Gumbel(0,1) distribution is equivalent to  $-\log(-\log(U))$  if  $U \sim \text{Uniform}[0, 1]$ . Therefore, an equivalent formulation is to take i.i.d. samples  $U_1, \dots, U_V$  from the Uniform[0,1]

distribution, then choose  $x^*$  as follows, which can be written in several equivalent ways:

$$\begin{aligned}
 x^* &:= \arg \max_{1 \leq i \leq V} [\log p(x_i) - \log(-\log(U_i))] \\
 &= \arg \max_{1 \leq i \leq V} \left[ \log \left( -\frac{p(x_i)}{\log(U_i)} \right) \right] \\
 &= \arg \min_{1 \leq i \leq V} \left[ -\frac{\log(U_i)}{p(x_i)} \right]. \quad (\text{Kuditipudi et al. [24] formulation})
 \end{aligned} \tag{B11}$$

$$= \arg \max_{1 \leq i \leq V} \left[ U_i^{1/p(x_i)} \right]. \quad (\text{Aaronson and Kirchner [22] formulation}) \tag{B12}$$

67 Aaronson and Kirchner [22] and Kuditipudi et al. [24] propose this method as a sam-  
 68 pling algorithm, using  $p := p_{\text{LM}}(\cdot|x_{<t})$  in the equations above; Kuditipudi et al. [24]  
 69 call the method *exponential minimum sampling*. In the terminology of this paper, the  
 70 Gumbel sampling algorithm for watermarking can be implemented by taking the ran-  
 71 dom seed  $r_t$  and setting each  $U_i$  to be a pseudorandom uniform  $g$ -value  $U_i := g(x_i, r_t)$   
 72 by setting the  $g$ -value distribution  $f_g = \text{Uniform}[0, 1]$ , as described in Methods  
 73 Section 5.4.

74 Gumbel sampling is a non-distortionary (Definition 16) deterministic sampling  
 75 algorithm that produces tokens with higher  $g(\cdot, r_t)$  values. As it is deterministic, it  
 76 provides no entropy to resample from; this is a disadvantage compared to probabilistic  
 77 sampling algorithms like Tournament sampling.

To detect the Gumbel watermark, we take a text  $x_1, \dots, x_T$  and compute its  
 $g$ -values  $g(x_1, r_1), \dots, g(x_T, r_T)$  which we denote  $g_1, \dots, g_T$  for short; these are inde-  
 pendent Uniform[0,1] distributed if  $x$  is unwatermarked and likely to be higher if  $x$   
 is watermarked. Aaronson and Kirchner [22] propose the following scoring function:

$$\text{LogScore}(x) := -\sum_{t=1}^T \log(1 - g_t). \tag{B13}$$

78 Another possible scoring function is  $\text{MeanScore}(x) = \frac{1}{T} \sum_{t=1}^T g_t$ , similar to  
 79 Equation (A1) for Tournament sampling. To provide a fair comparison to the Bayesian  
 80 scoring function for Tournament sampling (Supplementary Appendix A.4), we also  
 81 develop a learned Bayesian scoring function for the Gumbel watermark. Here, we use  
 82 the BayesianScore defined in Equation (A6), and approximate  $P(g|w)$  with a simple  
 83 multi-layer perceptron (MLP). Specifically,  $P(g|w) = \prod_{t=1}^T P(g_t|w)$  where  $P(g_t|w)$  is  
 84 computed by the MLP, which takes just a single number  $g_t$  as input.

### 85 B.1.2 Baseline: Soft Red List sampling

We use the recommended Soft Red List sampling algorithm from Kirchenbauer et al.  
 [23], in which a proportion  $\gamma \in (0, 1)$  of the vocabulary is green, the rest are red, and

a constant  $\delta > 0$  is added to all logits on the green list. Described in the terminology of Methods Section 5.4, this can be implemented by taking the random seed  $r_t$  and computing a  $g$ -value  $g(x_t, r_t)$  for each token  $x_t \in V$  using the  $g$ -value distribution  $f_g = \text{Bernoulli}(\gamma)$ , then sampling an output token  $x^*$  as follows:

$$\begin{aligned} \text{logit}(x_t) &:= \log p_{\text{LM}}(x_t|x_{<t}) + \delta g(x_t, r_t) && \text{for all } x_t \in V \\ p_{\text{wm}}(x_t) &:= \frac{\exp(\text{logit}(x_t))}{\sum_{x'_t \in V} \exp(\text{logit}(x'_t))} && \text{for all } x_t \in V \\ x^* &\sim p_{\text{wm}}. \end{aligned}$$

86 This is a distortionary (Definition 16) probabilistic sampling algorithm that produces  
87 tokens with higher  $g(\cdot, r_t)$  values. As a distortionary sampling algorithm, it has been  
88 shown to affect text quality (in particular increasing perplexity), especially when  $\delta$  is  
89 large or  $\gamma$  is small [23, 24].

To detect the Soft Red List watermark, we take a text  $x_1, \dots, x_T$  and compute its  $g$ -values  $g(x_1, r_1), \dots, g(x_T, r_T)$  which we denote  $g_1, \dots, g_T$  for short; these are independently  $\text{Bernoulli}(\gamma)$  distributed if  $x$  is unwatermarked and likely to be higher if  $x$  is watermarked. We can apply  $\text{MeanScore}(x) = \frac{1}{T} \sum_{t=1}^T g_t$ , similarly to Equation (A1). Alternatively, we can apply a Frequentist scoring function, similar to the method used by Kirchenbauer et al. [23]:

$$p\text{-value} = 1 - \text{CDF}_{\text{Binomial}(T, \gamma)} \left( \left[ \sum_{t=1}^T g_t \right] - 1 \right). \quad (\text{B14})$$

90 When all texts in the corpus are the same length,  $\text{MeanScore}$  is equivalent to Fre-  
91 quentistScore (see Supplementary Appendix A.3) and so in our experiments we use  
92  $\text{MeanScore}$  to match our methodology for Tournament sampling.

### 93 B.1.3 Other sampling algorithms

94 Here we mention a few more sampling algorithms, that we do not include as baselines:

- 95 • Inverse Transform Sampling (ITS) is a simple deterministic non-distortionary water-  
96 marking sampling algorithm, however it has been shown to have lower detectability  
97 than Gumbel sampling [24, 25], so we do not include it in our experimental baselines.
- 98 • Zhao et al. [39] propose a probabilistic distortionary sampling algorithm GIN-  
99 SEW, which involves applying a sinusoidal perturbation to the LLM probability  
100 distribution. For the distortionary category, we focus our comparison on the more  
101 widely-known Soft Red List sampling algorithm; to our knowledge GINSEW has not  
102 been empirically compared to Soft Red List so its relative performance is unknown.
- 103 • Hopper et al. [40] propose a watermarking sampling algorithm that is equivalent  
104 to the special case of Tournament sampling with  $m = 1$  layer,  $N = 2$  samples,  
105 and a  $\text{Bernoulli}(0.5)$   $g$ -value distribution; however, in its generality the Tournament  
106 sampling algorithm presented in this work is novel.



## 107 B.2 Random seed generators

108 In this work we use the sliding window random seed generator (Methods Section 5.3).  
109 As noted in the literature [24, 25], the sliding window method can introduce sequence-  
110 level distortion (e.g., repetitive loops in text) when the same context (and thus the  
111 same random seed) is used repeatedly. We avoid this problem by applying repeated  
112 context masking (Methods Section 5.6); however, there are other ways to designing a  
113 random seed generator while reducing the likelihood of repeatedly applying the same  
114 random seed.

115 Kuditipudi et al. [24] propose using a cycling sequence of random seeds – when  
116 paired with a distortion-free sampling algorithm, this method is *single-sequence non-*  
117 *distortionary* (Definition 20) if and only if the seed sequence is longer than the text  
118 length. However, meeting this criterion can be tricky in practice, as the maximum text  
119 length may be quite long, and increasing the seed sequence length reduces the overall  
120 watermark detectability as it requires searching for the correct alignment of the text  
121 and the seed sequence during detection. For this reason we do not use the cycling  
122 sequence method even though it is compatible with Tournament sampling; instead  
123 we choose a method (repeated context masking) that can give precise single-sequence  
124 non-distortion guarantees (Theorem 21) regardless of text length.

125 Another approach is proposed by Christ et al. [25]: like the sliding window method,  
126 they use recent text context to generate random seeds; however the algorithm adapts  
127 to the entropy in the text to guarantee that the likelihood of repeated seeds is low.  
128 While this approach (when paired with a non-distortionary sampling algorithm) meets  
129 a strong notion of cryptographic indistinguishability, it is also less robust to edits, more  
130 computationally expensive to detect, and has lower watermarking strength. However,  
131 if this type of indistinguishability is desired, the Tournament sampling algorithm can  
132 be combined with this entropy-adaptive method.

133 While the work discussed above focuses on avoiding random seed re-use in order  
134 to minimize distortion, Zhao et al. [41] take an opposite approach, using the same  
135 random seed on every step. They pair this random seed generator with the Soft Red  
136 List sampling algorithm and show that this ‘Unigram’ approach is more robust to  
137 edits than a sliding window approach. However, this robustness comes at the cost of  
138 decreased text quality and watermark security.

## 139 B.3 Scoring functions

140 In this work we focus on designing and evaluating scoring functions (Supplementary  
141 Appendix A) that score a whole text  $x$ , optimizing performance for the case that  
142  $x$  is either completely unwatermarked, or  $x$  is the full unaltered text generated by  
143 the watermarked LLM. However, it can be useful to consider other cases, such as  
144 when  $x$  contains a mix of watermarked and unwatermarked text, or when  $x$  is a  
145 watermarked text that has been edited. Our scoring functions still work in these  
146 scenarios, but their performance reduces as the amount of original watermarked text  
147 decreases (Supplementary Appendix C.6).

148 Existing work has proposed alternative scoring functions that perform better under  
149 these circumstances. Kuditipudi et al. [24] propose a block-based scoring function that,

150 for some specified block size  $k$ , searches through the text for the length- $k$  block of text  
151 with strongest watermarking evidence. Such a scoring function could be used with  
152 Tournament sampling; the scoring functions presented in Supplementary Appendix A  
153 could be modified to operate over blocks of text. Kuditipudi et al. [24] also propose a  
154 scoring function that is designed to be robust to edits; this scoring function searches  
155 for the minimum-cost alignment between the text and the watermark, accounting for  
156 edits with a Levenshtein cost. While both these scoring functions have the advantage  
157 of performing better when the text contains watermarked sub-passages, or when the  
158 text has been edited, their overall statistical power decreases in the case that the entire  
159 text is watermarked and unedited.

## 160 B.4 Additional techniques

161 Giboulot and Teddy [37] propose a generative watermarking approach that does not  
162 fit into the framework presented thus far – one samples multiple texts from the origi-  
163 nal unwatermarked LLM, then chooses the text that scores most highly according to  
164 a scoring function. While Giboulot and Teddy [37] show that this approach provides  
165 a good detectability-robustness-quality tradeoff, it substantially increases the compu-  
166 tational cost of text generation. As computational cost is one of the most important  
167 priorities in a production system, we do not experiment with this method.

168 In the category of distortionary sampling algorithms, Wouters [42] propose a  
169 method to reduce the distortion by applying the watermark only on steps when the  
170 expected perplexity increase is sufficiently low. This method could be applied to any  
171 distortionary sampling algorithm such as Soft Red List or distortionary Tournament  
172 sampling; however it is important to note that even if the perplexity is equal or lower  
173 than the unwatermarked LLM, the method is still distortionary.

## 174 Appendix C Non-Distortionary watermarking 175 experiments

176 In this section we present further experiments with non-distortionary SYNTHID-TEXT  
177 and the Gumbel sampling baseline.

### 178 C.1 Tournament depth and scoring functions

179 In this section we present our experiments comparing the performance of the differ-  
180 ent scoring functions for (non-distortionary) Tournament sampling (Supplementary  
181 Appendix A), and their interaction with Tournament depth (i.e., number of layers).

#### 182 *Bayesian learning procedure*

183 To learn the Bayesian scoring function (Supplementary Appendix A.4), the param-  
184 eters are optimized by minimizing the cross-entropy loss between the predictions and  
185 the labels (watermarked or unwatermarked) using gradient descent. We use 30% of the  
186 10,000 watermarked and 10,000 unwatermarked training samples for cross-validation,  
187 and the rest for learning the parameters. During cross-validation, we choose the param-  
188 eters maximizing  $\text{TPR@FPR}=1\%$  for texts of length 200 tokens on the validation set.

189 We use a learning rate of  $1 \times 10^{-3}$ , a mini-batch size of 64, and 50 epochs. Empirically  
190 we find that truncating the watermarked sequences to 200 tokens during training to  
191 synthetically increase the difficulty of the classification task improves the generaliza-  
192 tion performance. During testing, the full length of the text available to use is utilized  
193 without any truncation.

#### 194 *Weighted Mean learning procedure*

195 For the WeightedMean scoring function (Supplementary Appendix A.2.1), we find that  
196 the performance on the training/validation set is not sensitive to the choice of weights  
197 and we simply use a set of weights decaying linearly from 10.0 to 1.0 across the layers.

#### 198 *Results*

199 In Figure C1 we see that the Mean and WeightedMean scoring functions peak at  
200 certain depths, with detectability degrading as the depth is further increased. This is  
201 due to the fact that earlier layers contain more watermarking information than later  
202 layers (see Supplementary Appendix H.5). By contrast the Bayesian scoring function  
203 provides better performance than Mean and WeightedMean across all temperatures  
204 and depths. In particular, the Bayesian performance plateaus but does not decrease  
205 as we add more layers; this is because the Bayesian scoring function is able to learn  
206 to reduce the contributions from the later layers (see Supplementary Appendix A.4).  
207 The Bayesian scoring function also benefits from being able to model the expected  $g$ -  
208 values for the later layers based on the  $g$ -values from the earlier layers. The  $g$ -values  
209 are used by the scoring function to adjust  $p(g|w)$  for the later layers, leading to further  
210 improved detection performance. The WeightedMean and the Mean scoring functions  
211 are not able to adapt in a similar manner, resulting in their weaker performance. As  
212 we typically see diminishing returns beyond 30 tournament layers, for all experiments  
213 with non-distortionary SYNTHID-TEXT (including speculative sampling) we use 30  
214 tournament layers.

## 215 C.2 Gumbel sampling: scoring functions

216 For Gumbel sampling, we compare the LogScore  $\log(1 - g)$  scoring function and the  
217 learned Bayesian scoring function described in Supplementary Appendix B.1.1.

#### 218 *Bayesian learning procedure*

219 As described in Supplementary Appendix B.1.1, we train a MLP-based Bayesian  
220 scoring function for Gumbel sampling. Similar to the training procedure for the Tour-  
221 nament Bayesian scoring function, we use 30% of the 10,000 watermarked and 10,000  
222 unwatermarked training samples for cross-validation, and the rest for learning the  
223 parameters. During cross-validation, as before, we choose the parameters maximizing  
224 TPR@FPR=1% for texts of length 200 tokens on the validation set. We use a learn-  
225 ing rate of  $1 \times 10^{-3}$ , a mini-batch size of 64, and 50 epochs. We run a hyperparameter  
226 search where we vary the the number of hidden layers in the MLP over the set  $\{1, 2\}$ ,  
227 the number of hidden neurons per layer is varied over the set  $\{3, 5, 7, 10, 20, 50, 100\}$ ,  
228 the learning rate is varied over  $\text{logspace}(-3, -1, \text{num}=4)$ , i.e., we try four equidistant

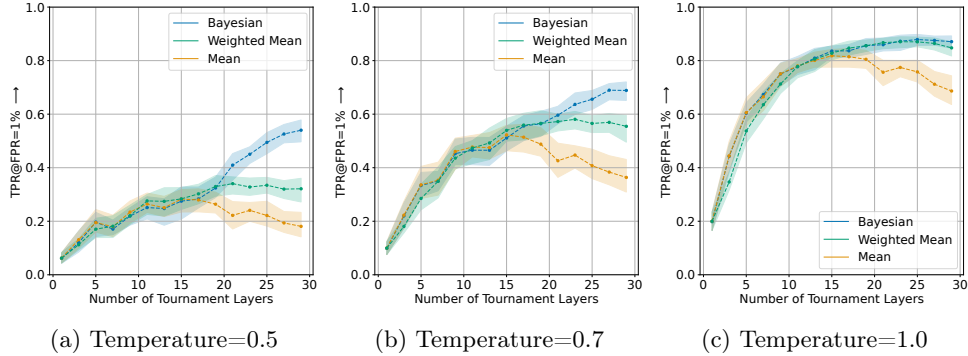

**Fig. C1:** Effect of number of tournament layers, and choice of scoring function on the detectability of text generated with non-distortionary SYNTHID-TEXT (all texts are 200 tokens). Texts are generated from Gemma 7B-IT with three different model temperatures. Detectability is measured by true positive rate at a false positive rate of 1% ( $\text{TPR@FPR=1\%}$ ). Dashed lines correspond to a bootstrap estimate of the mean  $\text{TPR@FPR=1\%}$ , and shaded regions correspond to the 90% confidence interval on the mean estimate.

229 values for the learning rate on the log-scale, ranging between  $10^{-3}$  to  $10^{-1}$ . We vary the  
 230 length for truncating the watermarked responses over 100, 200, 300, and 400 tokens.  
 231 We train MLPs across all of these parameter settings, and select the one perform-  
 232 ing the best on the cross-validation set based on  $\text{TPR@FPR=1\%}$  for texts of length  
 233 200 tokens. These parameters are then evaluated on the held-out test set without any  
 234 truncation.

### 235 **Results**

236 We see in Figure C2 that the two scoring functions have very similar performance, with  
 237 the LogScore  $\log(1 - g)$  performing slightly better in average, with the improvement  
 238 in most settings not being statistically significant. Unlike for Tournament sampling,  
 239 the learned scoring function does not improve performance; we conjecture this may be  
 240 because the function being learned  $\mathbb{P}(g|w)$ , a mixture of beta distributions [43], is more  
 241 complex for Gumbel sampling than that for Tournament sampling, where  $\mathbb{P}(g|w)$  for  
 242 each layer is a Bernoulli distribution. Additionally, the scoring function for Gumbel  
 243 sampling is not able to benefit from information provided in earlier layers. Given the  
 244 comparable performance of the two detection strategies, we use the  $\log(1 - g)$  scoring  
 245 function as the baseline throughout the paper.

### 246 **C.3 Diversity effects**

247 We also measure the diversity effects of the two watermarks. As discussed in Sup-  
 248 plementary Appendix G.3, our two non-distortionary baselines are *single-sequence*  
 249 *non-distortionary*, meaning they do not affect the diversity within a single text (e.g.,  
 250 they do not cause repeating loops in text). However, they do reduce the diversity

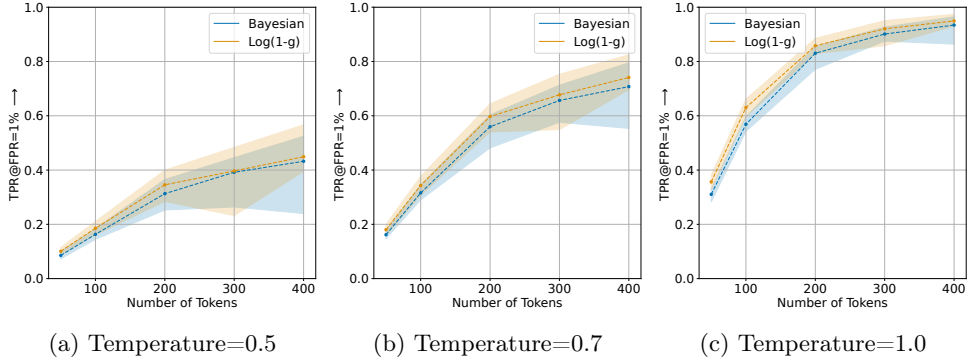

**Fig. C2:** Effect of choice of scoring function on the detectability of text generated with Gumbel sampling. Texts are generated from Gemma 7B-IT with three different model temperatures. Detectability is measured by true positive rate at a false positive rate of 1% (TPR@FPR=1%). Dashed lines correspond to a bootstrap estimate of the mean TPR@FPR=1%, and shaded regions correspond to the 90% confidence interval on the mean estimate.

251 across multiple responses; in particular, if we sample multiple responses to the same  
 252 prompt, they are more likely to be similar to each other if they are watermarked, than  
 253 if they are from the unwatermarked model. We measure this inter-response diversity  
 254 empirically by measuring the Self-BLEU similarity [44] between pairs of responses to  
 255 the same prompt.

256 To mitigate the inter-response diversity problem, Aaronson [45] suggest turning  
 257 off the watermark on a fraction of all timesteps, thus increasing the chance that the  
 258 texts diverge; however this reduces watermark detectability. We can achieve a similar  
 259 diversity/detectability trade-off with SYNTHID-TEXT simply by varying the number  
 260 of tournament layers; more layers provides stronger detectability and lower diver-  
 261 sity, while fewer layers provides weaker detectability and higher diversity. Extended  
 262 Data Figure 4 shows that the diversity/detectability trade-off is more favourable for  
 263 SYNTHID-TEXT than for Gumbel sampling. For this experiment we generated two  
 264 responses to each prompt using Gemma 7B-IT, and measured the pairwise Self-BLEU  
 265 between each pair of responses to the same prompt. We varied the number of Tour-  
 266 nament layers from 1 to 30, and the Gumbel watermark probability from 0.1 to  
 267 1.0.

## 268 C.4 Human preference test

269 In this section we provide details of the human preference test comparing non-  
 270 distortionary SYNTHID-TEXT to unwatermarked responses. For this experiment we  
 271 sample both a watermarked and an unwatermarked response to 3,000 ELI5 [30] ques-  
 272 tions from a Gemma 7B-IT model with a temperature of 0.7. We present the two  
 273 responses side-by-side, randomly labelled A and B, alongside the ELI5 question, to  
 274 human raters on the Prolific platform. Raters are presented with five questions:

- 275 • (Relevance) Which response is more relevant to the question?
- 276 • (Correctness) To the extent you can tell, which response is more correct?
- 277 • (Helpfulness) Which response do you find more helpful overall?
- 278 • (Grammaticality/coherence) Which response is better in terms of grammatical
- 279 correctness, comprehensibility and coherence?
- 280 • (Overall quality) Taking into account the overall answer relevance, correctness, help-
- 281 fulness, as well as grammatical correctness, which of the two responses is of higher
- 282 quality?

283 For each of these five questions, raters choose one of the following options: *Response*  
 284 *A*, *Response B*, *Both are low quality*, or *Both are high quality*.

285 To measure the rater agreement, we ran a pilot study over 100 examples, annotated  
 286 fourfold, and measured the pairwise rater agreement over all paired non-tie ratings.  
 287 We find agreements of 73.4% (*relevance*), 73.6% (*correctness*), 67.8% (*helpfulness*),  
 288 75.9% (*grammaticality / coherence*), and 63.7% (*overall quality*); broadly in line with  
 289 previous work [46].

290 Extended Data Table 1 shows the results. For our analyses we consider the null  
 291 hypothesis to be that there is no difference in the response quality between water-  
 292 marked vs. unwatermarked responses. In our first analysis, we only consider the non-tie  
 293 cases (i.e. where the rater expressed a preference for one of the two responses), and  
 294 calculate the fraction of cases preferring the watermarked response vs. the cases pre-  
 295 ferring the unwatermarked response. We calculate symmetric 95% confidence intervals  
 296 using bootstrap resampling of the 3,000 collected responses. For all of the five ques-  
 297 tions, 50% (the value expected under the null hypothesis) is within this confidence  
 298 interval. In our second analysis, we include the neutral ratings by grouping the *Both*  
 299 *are low quality* and *Both are high quality* ratings into a *tie* label. Similarly here, none  
 300 of the *p*-values under a trinomial test reaches statistical significance. We conclude that  
 301 for all five ratings, the data collected does not provide sufficient evidence to reject the  
 302 null hypothesis of no difference between watermarked and unwatermarked responses.

## 303 C.5 Automatic quality evaluations

304 We provide results of several automatic quality evaluations to demonstrate that non-  
 305 distortionary SYNTHID-TEXT is quality-neutral:

- 306 • Table C1 shows that non-distortionary SYNTHID-TEXT and the Gumbel baseline
- 307 both have no effect on perplexity, for a variety of models and temperatures.
- 308 • Table C2 shows that non-distortionary SYNTHID-TEXT performs equally well as the
- 309 equivalent unwatermarked model on a collection of automatic benchmarks assessing
- 310 coding ability [47, 48], language modeling [49], mathematics [50, 51], and general
- 311 abilities of foundation models [52, 53], for Gemma 2B-PT and 7B-PT. Note that
- 312 these experiments use 20 tournament layers, rather than 30. We find no prefer-
- 313 ence between responses watermarked with non-distortionary SYNTHID-TEXT, and
- 314 unwatermarked responses.

| Model            | Temp. | Unwatermarked           | Non-distort. SYNTHID-TEXT | Gumbel                  |
|------------------|-------|-------------------------|---------------------------|-------------------------|
| 2B-IT<br>Gemma   | 1.0   | 1.720<br>[1.709, 1.729] | 1.726<br>[1.716, 1.740]   | 1.715<br>[1.699, 1.732] |
|                  | 0.7   | 1.509<br>[1.499, 1.515] | 1.500<br>[1.496, 1.506]   | 1.487<br>[1.472, 1.499] |
|                  | 0.5   | 1.401<br>[1.395, 1.407] | 1.411<br>[1.407, 1.416]   | 1.395<br>[1.387, 1.407] |
| 7B-IT<br>Gemma   | 1.0   | 1.464<br>[1.447, 1.479] | 1.451<br>[1.444, 1.459]   | 1.449<br>[1.441, 1.454] |
|                  | 0.7   | 1.307<br>[1.304, 1.311] | 1.306<br>[1.303, 1.310]   | 1.301<br>[1.292, 1.313] |
|                  | 0.5   | 1.246<br>[1.242, 1.250] | 1.241<br>[1.236, 1.249]   | 1.247<br>[1.241, 1.253] |
| 7B-IT<br>Mistral | 1.0   | 1.408<br>[1.399, 1.418] | 1.402<br>[1.393, 1.413]   | 1.399<br>[1.393, 1.405] |
|                  | 0.7   | 1.269<br>[1.263, 1.276] | 1.266<br>[1.262, 1.270]   | 1.268<br>[1.261, 1.273] |
|                  | 0.5   | 1.218<br>[1.211, 1.222] | 1.205<br>[1.200, 1.209]   | 1.203<br>[1.196, 1.210] |

**Table C1:** Mean LLM perplexity [54] for different models and temperatures, for unwatermarked text and text watermarked with non-distortionary SYNTHID-TEXT and with Gumbel sampling. Each result is given with a 90% confidence interval based on bootstrapping. For these non-distortionary watermarks, there is no change to perplexity. The perplexity of the generated texts with and without watermarking is measured with respect to the probabilities provided by the underlying LLM.

## 315 C.6 Detectability under perturbation

316 We evaluate the detectability of (non-distortionary) SYNTHID-TEXT after the water-  
317 marked text has been perturbed via (a) random word deletion and (b) LLM  
318 paraphrasing. First, we generate watermarked texts using the Gemma 2B-IT and 7B-IT  
319 models prompted with 3,000 prompts from the ELI5 dataset [30]. For random word  
320 deletion, we randomly delete either 20% or 50% of words (defined by space separation).  
321 For LLM paraphrasing, we prompt Gemini Ultra with ‘Paraphrase the following arti-  
322 cle, while retaining the same semantic meaning, without losing any details. Please  
323 paraphrase sentence by sentence. Don’t summarize only.’ and enforce the output sample to start with “Paraphrase:”. Some paraphrasing examples  
324 are shown in Table C3 (bottom).  
325

326 Figure C3 shows the results. Like other generative watermarks, SYNTHID-TEXT  
327 provides some robustness to edits – i.e., editing the text weakens detectability, but the  
328 watermark can still be detected with high accuracy if the text is sufficiently long. The  
329 paraphrasing attack is quite strong, especially if we use a strong paraphrasing model  
330 like Gemini Ultra and obtain a thoroughly paraphrased text that changes most of  
331 the phrasing of the text.

| Benchmark<br>(type)   | Metric $\uparrow$           | Unwatermarked             |                           | Non-distort. SYNTHID-TEXT |                           |
|-----------------------|-----------------------------|---------------------------|---------------------------|---------------------------|---------------------------|
|                       |                             | 2B-PT                     | 7B-PT                     | 2B-PT                     | 7B-PT                     |
| MMLU (lang. modeling) | [49] 5-shot, top-1          | 32.42<br>[31.73%, 33.03%] | 57.73<br>[57.05%, 58.38%] | 32.9<br>[32.22%, 33.55%]  | 58.25<br>[57.6%, 58.97%]  |
| HumanEval (coding)    | [47] pass@1                 | 14.02<br>[9.76%, 18.9%]   | 26.22<br>[20.73%, 31.71%] | 11.59<br>[7.32%, 15.24%]  | 25.61<br>[20.12%, 31.1%]  |
| MBPP (coding)         | [48] 3-shot                 | 19.4<br>[16.6%, 22.4%]    | 34.4<br>[30.8%, 37.8%]    | 20.6<br>[17.8%, 23.8%]    | 37.2<br>[33.6%, 41.0%]    |
| GSM8K (maths)         | [50] accuracy (all samples) | 9.17<br>[8.72%, 9.61%]    | 38.26<br>[37.48%, 39.01%] | 9.49<br>[9.0%, 9.96%]     | 39.14<br>[38.38%, 39.89%] |
| MATH (maths)          | [51] 4-shot                 | 7.28<br>[6.72%, 7.84%]    | 15.72<br>[14.82%, 16.56%] | 7.2<br>[6.64%, 7.8%]      | 15.64<br>[14.82%, 16.46%] |
| AGIEval (general)     | [52] -                      | 24.02<br>[22.39%, 25.43%] | 42.44<br>[40.64%, 44.19%] | 24.1<br>[22.69%, 25.43%]  | 42.44<br>[40.85%, 44.06%] |
| BBH (general)         | [53] -                      | 31.92<br>[30.98%, 32.81%] | 53.34<br>[52.39%, 54.35%] | 31.45<br>[30.5%, 32.35%]  | 53.6<br>[52.59%, 54.68%]  |

**Table C2:** Comparing the performance of unwatermarked and non-distortionary SYNTHID-TEXT responses from Gemma 2B-PT and 7B-PT, across a range of automated LLM performance benchmarks. Each metric is given with a 90% confidence interval. Non-distortionary SYNTHID-TEXT does not affect performance on these benchmarks. The unwatermarked Gemma metrics differ to those reported in Team et al. [28] due to different sampling configurations.

| Watermarked text                                                                                                                                                                                                                                                                                                                                                            | LLM-paraphrased version                                                                                                                                                                                                                                                                                                                                                                                       |
|-----------------------------------------------------------------------------------------------------------------------------------------------------------------------------------------------------------------------------------------------------------------------------------------------------------------------------------------------------------------------------|---------------------------------------------------------------------------------------------------------------------------------------------------------------------------------------------------------------------------------------------------------------------------------------------------------------------------------------------------------------------------------------------------------------|
| The actual cause of death in hypothermia is respiratory failure. When the body temperature drops below 95 degrees Fahrenheit, the respiratory center in the brain starts to fail, which leads to shallow breathing and slow heart rate. If the body temperature drops to below 90 degrees Fahrenheit, the heart and kidneys begin to fail, which eventually leads to death. | Hypothermia ultimately results in death due to the cessation of breathing. \n\nAs the body's temperature falls below 95 degrees Fahrenheit, the brain's respiratory control center malfunctions, causing shallower breaths and a reduced heart rate. \n\nFurther cooling to below 90 degrees Fahrenheit triggers the failure of the heart and kidneys, leading to the inevitable outcome of death."           |
| A rock does not stay at 0 mph for a single moment during its motion. It has a velocity of 0 mph at the instant it is thrown up, but it gains acceleration due to gravity as it rises and reaches a maximum velocity at the highest point of its trajectory. After that, it decelerates and approaches 0 velocity as it falls back to the ground.                            | During its entire journey, a rock never maintains a velocity of 0 mph. When initially propelled upwards, it momentarily possesses a velocity of 0 mph; however, the force of gravity causes it to accelerate during its ascent, culminating in its maximum velocity at the peak of its path. Subsequently, the rock decelerates as it descends, its velocity approaching 0 mph upon its return to the ground. |

**Table C3:** Examples of watermarked text after paraphrasing with Gemini Ultra.

## 332 C.7 Comparison to post-hoc methods

333 As discussed in Section 1, *post-hoc methods* are a family of AI text detection methods  
334 that use machine learning or other statistical signals [14–16]. However, these methods  
335 can have inconsistent performance, for example on out-of-domain data [16, 17]. In  
336 this section we demonstrate that (non-distortionary) SYNTHID-TEXT performs more



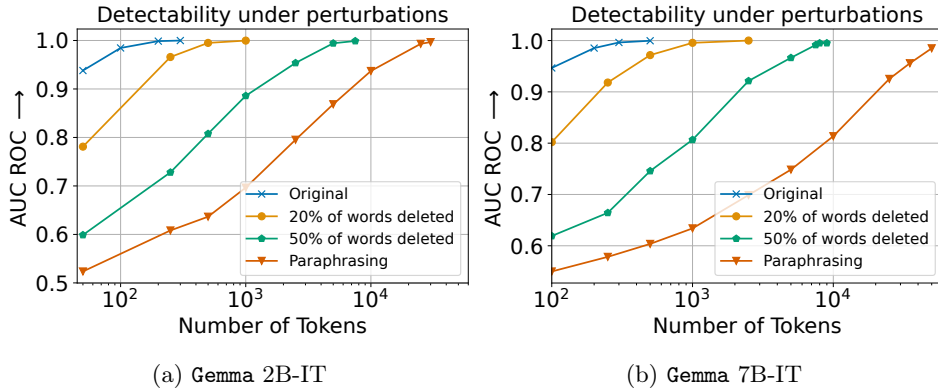

**Fig. C3:** Detectability of SYNTHID-TEXT-watermarked text after applying perturbations to the watermarked text. Detectability is weakened by edits, particularly paraphrasing with a strong LLM (Gemini Ultra); however, the watermark is still detectable if the text is long enough.

337 consistently across different data sources than the most capable openly available post-  
 338 hoc detector BINOCULARS [15]. BINOCULARS works by computing the cross-perplexity  
 339 of the text with respect to two LLMs (the intuition being that text from two different  
 340 LLMs is more similar than text from an LLM and text from a human). Hans et al. [15]  
 341 report that BINOCULARS performs best using the Falcon 7B and Falcon 7B-instruct  
 342 models [55]; we use these for our comparison.

343 To test detection performance across multiple languages, we evaluate both BINOC-  
 344 ULARS and SYNTHID-TEXT across 8 languages, using the XLSum dataset [56]. To  
 345 produce AI-generated text, for each language we use Gemma 7B-IT with SYNTHID-  
 346 TEXT to generate 256 watermarked news articles from XLSum summaries, using one  
 347 of the following two prompts: ‘Read the following sentence carefully and then expand  
 348 it to a news article.’ and ‘Write a news article based on the following summary.’. We  
 349 performed no further filtering of generated text. We then evaluate detection perfor-  
 350 mance, using an equal proportion of XLSum news articles as human-written data. Hans  
 351 et al. [15] report that BINOCULARS performs more poorly on non-English and lower-  
 352 resource languages, due to the fact that the Falcon models have limited capabilities  
 353 in these languages. Indeed, in Figure C4 we see that BINOCULARS performs poorly on  
 354 Hindi, Arabic and Russian; in contrast SYNTHID-TEXT detects all languages well.

355 Our results serve as a demonstration that like other generative watermarks,  
 356 SYNTHID-TEXT is data-agnostic – its performance depending only on the length and  
 357 entropy of the generated text; this is a significant advantage of generative water-  
 358 marking compared to post-hoc methods. Other relative advantages of generative  
 359 watermarking include the option to provide an interpretable decision (e.g. a  $p$ -value)  
 360 that can be used to control the false positive rate; and not requiring the additional  
 361 cost of running LLMs during detection. While our results indicate that generative

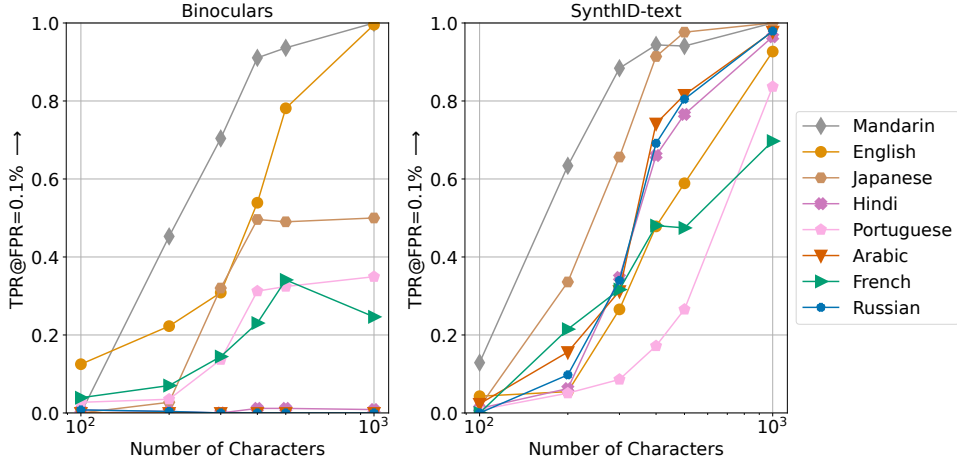

**Fig. C4:** Comparison of detection rates for Gemma 7B-IT-generated text in different languages: SYNTHID-TEXT watermarking vs. the post-hoc BINOCULARS detector [15]. We assess texts in 8 languages, prompted with XLSum [56]. BINOCULARS, which relies on cross-perplexity statistics drawn from underlying LLMs, performs poorly on some languages such as Hindi, Arabic and Russian. By contrast SYNTHID-TEXT performs well in all languages considered.

362 watermarking is a superior choice when one has control over the generation procedure,  
 363 post-hoc methods remain a useful and complementary tool when that control is  
 364 unavailable.

### 365 C.8 Selective Prediction

366 In some applications it may be critical to maintain a low false positive rate and a low  
 367 false negative rate. In such scenarios, particularly if the texts are short or the LLM  
 368 distribution has low entropy (e.g. due to low temperature or instruction tuning), the  
 369 detection performance may be lower than desired. In this case we may use a selective  
 370 prediction mechanism that abstains when it is uncertain about the presence or absence  
 371 of the watermark in a piece of text. This allows us to achieve the desired error rates  
 372 on the non-abstained texts.

373 The mechanism operates based on the principles of standard hypothesis testing  
 374 [57]. For each length of text, we compute a threshold  $\tau_{\text{negative}}$  on the watermarking  
 375 scores that corresponds to the desired false negative rate (computed empirically based  
 376 on a set of watermarked texts). Similarly, we compute a threshold  $\tau_{\text{positive}}$  correspond-  
 377 ing to a desired false positive rate, based on a set of unwatermarked texts. A given  
 378 piece of text is classified as watermarked if its score is over the  $\tau_{\text{positive}}$  threshold for its  
 379 length, unwatermarked if its score is under  $\tau_{\text{negative}}$ , and no prediction is made (absten-  
 380 tion) if the score is between  $\tau_{\text{negative}}$  and  $\tau_{\text{positive}}$ . Note that when  $\tau_{\text{positive}} < \tau_{\text{negative}}$ ,  
 381 the scoring function’s performance at that length already satisfies the desired error  
 382 rates without need for abstention.

383 For example, suppose we require a false positive rate of 1% and a false negative  
384 rate of 5%. Extended Data Figure 3 shows the necessary abstention rates in order  
385 to achieve these error rates on the non-abstained texts, for Gemma 7B-IT at various  
386 temperatures and text lengths.

## 387 Appendix D Distortionary watermarking 388 experiments

389 In this section we present our experiments comparing distortionary SYNTHID-TEXT  
390 to the Soft Red List watermark. We use the Gemma 7B-IT model, and a test  
391 set of 1500 prompts from the ELI5 dataset. Extended Data Figure 2 shows the  
392 detectability/quality results for a variety of temperatures and text lengths.

### 393 *Distortionary Tournament sampling settings*

394 We evaluate Tournament sampling with the number of leaves per node ( $N$ ) set to 2,  
395 3, 4, 5, 7, 10, 15, 50 and 1000, and the number of layers ( $m$ ) set to 2, 3, 4, 6, 8 and  
396 10. For simplicity, we only plot the Pareto front of the tournament configurations in  
397 Extended Data Figure 2, showing the best detection performance given an allowance  
398 for quality (i.e. perplexity) degradation. To compute this, we consider various thresh-  
399 olds for perplexity (x-axis), and plot the best-performing tournament configuration  
400 with a perplexity less than this threshold.

### 401 *Soft Red List settings*

402 Following the methodology of Kirchenbauer et al. [23], we sweep over  $\delta = 1, 2, 5, 10$   
403 where  $\delta$  is the scaling factor of the perturbation added to the logits, and  $\gamma =$   
404  $0.1, 0.25, 0.5, 0.75, 0.9$  where  $\gamma$  is the size of the green list as fraction of the LLM  
405 vocabulary. We also evaluate stronger watermarking with  $\delta = 15, 20$ . Similarly to  
406 Tournament sampling, we plot the Pareto front in Extended Data Figure 2.

## 407 Appendix E Vectorized Tournament sampling

408 In this section we derive vectorized formulations of Tournament sampling, providing  
409 an alternative but equivalent implementation to Methods Algorithm 2. First we define  
410 some notation:

**Definition 9** (Watermarked distribution). *Given a probability distribution  $p$  over  $V$ , a random seed  $r \in \mathcal{R}$ , a number of samples  $N \geq 2$ , a  $g$ -value distribution  $f_g$ , and a number of layers  $m \geq 1$ , the watermarked distribution  $p_{wm}(\cdot|p, r, f_g, N, m)$  is the probability distribution of the winner of Methods Algorithm 2:*

$$p_{wm}(x_t|p, r, f_g, N, m) = \mathbb{P}[\text{Alg2}(p, r, f_g, N, m) \text{ returns } x_t].$$

**Definition 10 .** Given a probability distribution  $p$  over  $V$ , random seed  $r \in \mathcal{R}$ , and  $g$ -values  $\{g_\ell(x, r)\}_{x \in V}$  as defined in Methods Definition 4, we define the notation:

$$\begin{aligned} p(V=g_\ell(x_t, r)) &:= \sum_{x \in V: g_\ell(x, r)=g_\ell(x_t, r)} p(x) \\ p(V<g_\ell(x_t, r)) &:= \sum_{x \in V: g_\ell(x, r)<g_\ell(x_t, r)} p(x) \\ p(V \leq g_\ell(x_t, r)) &:= \sum_{x \in V: g_\ell(x, r) \leq g_\ell(x_t, r)} p(x). \end{aligned}$$

## 411 E.1 Single-layer Tournament sampling

**Theorem 11** (Vectorized form, single-layer Tournament sampling). Given a probability distribution  $p$  over  $V$ , random seed  $r \in \mathcal{R}$ ,  $g$ -value distribution  $f_g$ , and number of samples  $N \geq 2$ , the watermarked distribution  $p_{wm}(\cdot|p, r, f_g, N, m)$  for  $m = 1$  is given by:

$$p_{wm}(x_t|p, r, f_g, N, 1) = \begin{cases} p(x_t) \left( \frac{p(V \leq g_1(x_t, r))^N - p(V < g_1(x_t, r))^N}{p(V = g_1(x_t, r))} \right) & \text{if } p(x_t) \neq 0 \\ 0 & \text{if } p(x_t) = 0. \end{cases} \quad (\text{E15})$$

412 *Proof.* See Supplementary Appendix K.2. □

### 413 E.1.1 Simplified formulations for special cases

414 In practice, Equation (E15) has simpler formulations for certain choices of the number  
415 of samples  $N$  or the  $g$ -value distribution  $f_g$ . All of our experiments use one the forms  
416 provided in this subsection.

**Corollary 12** (Vectorized form, single-layer Tournament sampling, two samples). If in Theorem 11 the number of samples  $N$  equals 2, then:

$$p_{wm}(x_t|p, r, f_g, N, 1) = p(x_t) \left[ p(V = g_1(x_t, r)) + 2p(V < g_1(x_t, r)) \right]. \quad (\text{E16})$$

**Corollary 13** (Vectorized form, single-layer Tournament sampling, continuous  $g$ -values). If in Theorem 11 the  $g$ -value distribution  $f_g$  is continuous (i.e. the probability that two  $g$ -values are the same is zero) then:

$$p_{wm}(x_t|p, r, f_g, N, 1) = \left( p(x_t) + p(V < g_1(x_t, r)) \right)^N - p(V < g_1(x_t, r))^N. \quad (\text{E17})$$

In particular if  $N = 2$ , then:

$$p_{wm}(x_t|p, r, f_g, 2, 1) = p(x_t) \left[ p(x_t) + 2p(V < g_1(x_t)) \right]. \quad (\text{E18})$$

**Corollary 14** (Vectorized form, single-layer Tournament sampling, binary  $g$ -values). *If in Theorem 11 the  $g$ -value distribution  $f_g$  is binary (i.e. all  $g$ -values are 0 or 1) then:*

$$p_{wm}(x_t|p, r, f_g, N, 1) = \begin{cases} p(x_t)p(V^{g_1=0})^{N-1} & \text{if } g_1(x_t, r) = 0 \\ p(x_t) \left( \frac{1 - p(V^{g_1=0})^N}{p(V^{g_1=1})^{N-1}} \right) & \text{if } g_1(x_t, r) = 1 \end{cases} \quad (\text{E19})$$

where the notation  $p(V^{g_1=0})$  means  $\sum_{x \in V: g_1(x, r)=0} p(x)$  and similarly for  $p(V^{g_1=1})$ . In particular, if  $N = 2$ , then:

$$p_{wm}(x_t|p, r, f_g, 2, 1) = p(x_t) [1 + g_1(x_t, r) - p(V^{g_1=1})]. \quad (\text{E20})$$

## 417 E.2 Multi-layer Tournament sampling

418 Now we show that we can simply repeatedly apply Equation (E15) (or one of the  
419 special cases in Supplementary Appendix E.1.1) to obtain the vectorized form of a  
420 multi-layer tournament:

**Theorem 15** (Vectorized form, multi-layer Tournament sampling). *Given a probability distribution  $p \in \Delta V$ , a number of samples  $N \geq 2$ , and a set of real values  $\{g(x)\}_{x \in V}$ , define the transformation  $W$  which gives a distribution  $W(p, g(\cdot), N) \in \Delta V$ :*

$$W(p, g(\cdot), N)(x_t) = \begin{cases} p(x_t) \left( \frac{p(V^{\leq g(x_t)})^N - p(V^{< g(x_t)})^N}{p(V^{=g(x_t)})} \right) & \text{if } p(x_t) \neq 0 \\ 0 & \text{if } p(x_t) = 0. \end{cases} \quad (\text{E21})$$

Now, given a random seed  $r \in \mathcal{R}$ ,  $g$ -value distribution  $f_g$ , number of samples  $N \geq 2$ , and number of layers  $m \geq 1$ , consider the following sequence of distributions, defined through repeated application of  $W$ :

$$\begin{aligned} p_{wm}^{(1)}(\cdot) &:= W(p, g_1(\cdot, r), N) \\ p_{wm}^{(2)}(\cdot) &:= W(p_{wm}^{(1)}, g_2(\cdot, r), N) \\ &\dots \\ p_{wm}^{(m)}(\cdot) &:= W(p_{wm}^{(m-1)}, g_m(\cdot, r), N). \end{aligned} \quad (\text{E22})$$

421 It follows that  $p_{wm}^{(m)}(\cdot)$  is equal to the  $m$ -layer Tournament watermarked distribution  
422  $p_{wm}(\cdot|p, r, f_g, N, m)$  (Definition 9).

423 *Proof.* Proof by induction on  $m$ . The base case  $m = 1$  is given by Theorem 11.

424 For the induction case, suppose Theorem 15 is true for  $m - 1$ . Now consider  
425 an  $m$ -layer tournament; it is equivalent to running  $N$ -many  $(m - 1)$ -layer tourna-  
426 ments and then putting the winners into a single-layer tournament using  $g_m(\cdot, r)$ .  
427 By the induction assumption, the  $N$  winners are drawn from  $p_{wm}^{(m-1)}(\cdot)$  as defined in

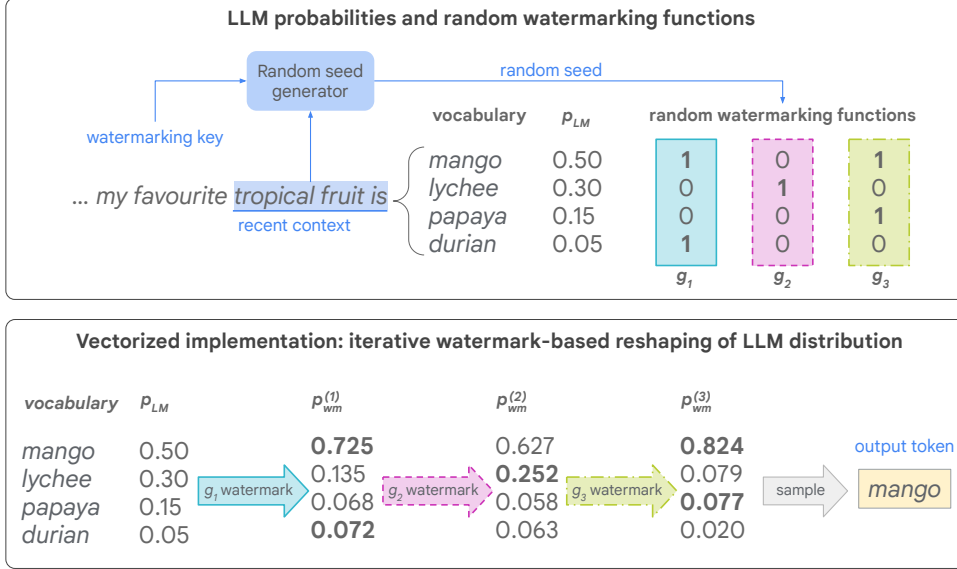

**Fig. E5:** Illustration of the vectorized implementation of SYNTHID-TEXT watermarking for the same example as Figure 2 in the main paper. Each ‘watermark’ arrow corresponds to a tournament layer, and represents an application of Equation (E20), which modifies the LLM distribution based on a random watermarking function  $g_\ell$ . The output token is sampled from the final distribution after all layers (here, 3) have been applied.

428 Equation (E22), and by Theorem 11 the winner of the single-layer tournament is given  
 429 by  $W(p_{wm}^{(m-1)}, g_m(\cdot, r), N)$ . □

### 430 E.3 Implementation

431 Theorem 15 provides an alternative implementation to Algorithm 2 for a multi-layer  
 432 tournament: instead of sampling and running a tournament, we can simply compute  
 433 Equations E22 to obtain the watermarked distribution  $p_{wm}(\cdot | p, r, f_g, N, m)$ , then sam-  
 434 ple directly from it. Figure E5 shows how this works for the three-layer ( $m = 3$ )  
 435 two-sample ( $N = 2$ ) tournament with binary  $g$ -values previously presented in Figure 2  
 436 in the main paper.

437 One advantage of the vectorized implementation is that it provides the entire  
 438 watermarked distribution (which can be useful for downstream purposes), whereas  
 439 the tournament implementation provides just one sample from the watermarked dis-  
 440 tribution. The two implementations have different computational advantages; see  
 441 Supplementary Appendix F. In practice we use the vectorized formulation for our  
 442 experiments.

| Method                                             | Samples | $g$ -value computations | Other operations   |
|----------------------------------------------------|---------|-------------------------|--------------------|
| Tournament (Alg 2)                                 | $N^m$   | $\min(m V , N^{m+1})$   | $N^m - 1$          |
| Vectorised tournament, general (Thm 15)            | 1       | $m V $                  | $O(m V  \log  V )$ |
| Vectorised tournament, binary $g$ -values (Cor 14) | 1       | $m V $                  | $O(m V )$          |
| Gumbel sampling                                    | 0       | $ V $                   | $O( V )$           |
| Soft Red List                                      | 1       | $ V $                   | $O( V )$           |

**Table F4:** Computational complexity of the Tournament, Gumbel, and Soft Red List sampling algorithms.  $|V|$  is the size of the support of the LLM distribution as defined in Methods Definition 1. For Tournament sampling,  $m$  is number of layers and  $N$  is the number of samples per node. Proofs are given in Supplementary Appendix K.3.

## 443 Appendix F Computational complexity

444 In Table F4 we summarise the theoretical computational complexity of the Tourna-  
445 ment, Gumbel, and Soft Red List sampling algorithms. Tournament sampling generally  
446 has higher computational complexity than Gumbel or Soft Red List sampling; however  
447 if  $|V|$  is large compared to  $N^{m+1}$  then Tournament sampling (the tournament-based  
448 Methods Algorithm 2 implementation) may have lower complexity. Nonetheless, in the  
449 context of the computational complexity of generating text from a large LLM, these  
450 differences are in practice negligible (see Section 3 in main paper).

451 When implementing Tournament sampling, there is the option to use the vectorised  
452 version presented in Supplementary Appendix E, instead of the tournament-style  
453 implementation presented in Methods Algorithm 2. Furthermore, the complexity of  
454 the vectorised version depends on our choice of  $g$ -value distribution; if we are using  
455 binary  $g$ -values (e.g. Bernoulli  $g$ -value distribution) the complexity is lower than if  
456 we are using continuous  $g$ -values (e.g. Uniform  $g$ -value distribution). In our experi-  
457 ments, we find that the vectorised implementation is faster than the tournament-style  
458 implementation – in general this is true especially if  $N^m$  is large compared to  $|V|$ .  
459 However, if  $|V|$  is comparatively large, then the tournament-style implementation may  
460 be faster. Note that  $|V|$  is the size of the support of the LLM distribution  $p_{\text{LM}}(\cdot|x_{<t})$   
461 as defined in Methods Definition 1; if top- $p$  or top- $k$  truncation is applied, this can be  
462 considerably smaller than the size of the LLM’s full vocabulary.

## 463 Appendix G Non-distortion

464 Ideally, a watermark should not distort the LLM’s output distribution, as we would  
465 like watermarked text to have the same quality as text from the unwatermarked LLM.  
466 In this section we show that Tournament sampling with  $N = 2$  samples is *non-*  
467 *distortionary* at the token level, and when paired with repeated context masking, is  
468 non-distortionary at the (multi-)sequence level too. We then discuss these different  
469 levels of non-distortion and their trade-offs.

470 **G.1 Non-distortion at the token level**

471 A sampling algorithm (Methods Definition 5) is *non-distortionary* as defined by  
 472 Kuditipudi et al. [24]<sup>2</sup> if in expectation over the random seed  $r$ , the watermarked dis-  
 473 tribution is equal to the original LLM distribution. We call this property *single-token*  
 474 *non-distortion*:

**Definition 16** (Single-token non-distortionary sampling algorithm). *A sampling algo-  
 rithm  $\mathcal{S} : \Delta V \times \mathcal{R} \rightarrow V$  is (single-token) non-distortionary if for any probability  
 distribution  $p \in \Delta V$  and token  $x \in V$ :*

$$\mathbb{E}_{r \sim \text{Unif}(\mathcal{R})} [\mathbb{P}(\mathcal{S}(p, r) = x)] = p(x).$$

475 *If  $\mathcal{S}$  is not non-distortionary, we call it distortionary.*

476 Definition 16 is an important property of a sampling algorithm, providing a guar-  
 477 antee at the single token level; specifically, that  $\mathcal{S}$  is a valid pseudorandom sampler  
 478 with respect to the seed  $r$ . However, it makes no guarantee at the sequence level;  
 479 for this reason we refer to Definition 16 as *single-token non-distortion*, to differenti-  
 480 ate it from sequence-level non-distortion (discussed in the next subsection). Of our  
 481 baseline sampling algorithms, Gumbel sampling (Supplementary Appendix B.1.1) is  
 482 non-distortionary and Soft Red List (Supplementary Appendix B.1.2) is distortionary.

483 We now show in the next three theorems that two-sample ( $N = 2$ ) Tournament  
 484 sampling is a non-distortionary sampling algorithm (single-layer and multi-layer); how-  
 485 ever, Tournament sampling with  $N > 2$  samples is distortionary. These theorems refer  
 486 to the watermarked distribution  $p_{\text{wm}}$  from Definition 9.

**Theorem 17** (Single-layer two-sample Tournament sampling is non-distortionary).  
*For any probability distribution  $p$  over  $V$ ,  $g$ -value distribution  $f_g$ , and token  $x_t \in V$ :*

$$\mathbb{E}_{r_t \sim \text{Unif}(\mathcal{R})} [p_{\text{wm}}(x_t | p, r_t, f_g, 2, 1)] = p(x_t).$$

487 *Proof.* See Supplementary Appendix K.4. □

**Theorem 18** (Multi-layer two-sample Tournament sampling is non-distortionary).  
*For any probability distribution  $p$  over  $V$ ,  $g$ -value distribution  $f_g$ , number of layers  
 $m \geq 1$ , and token  $x_t \in V$ :*

$$\mathbb{E}_{r_t \sim \text{Unif}(\mathcal{R})} [p_{\text{wm}}(x_t | p, r_t, f_g, 2, m)] = p(x_t). \tag{G23}$$

488 *Proof.* See Supplementary Appendix K.5. □

489 **Theorem 19** (Tournament sampling is distortionary for  $N > 2$  samples). *Given any  
 490  $g$ -value distribution  $f_g$  (that is not one-hot) and any integer  $N > 2$ , then single-layer  
 491 Tournament sampling using  $f_g$  and  $N$  is distortionary.*

---

<sup>2</sup>Kuditipudi et al. [24] call this property *distortion-free*.



492 *Proof.* See Supplementary Appendix K.6. □

## 493 G.2 Non-distortion at the (multi-)sequence level

494 We now move to a notion of non-distortion at the level of one or more sequences. We  
 495 define a watermarking scheme to be *K-sequence non-distortionary* if the probability  
 496 of the watermarked model generating a particular sequence of  $K \geq 1$  responses to a  
 497 particular sequence of  $K$  prompts supplied consecutively is, in expectation over the  
 498 watermarking key, the same as generating them from the original model. Our definition  
 499 is similar to the *K-shot undetectable* property defined by Hu et al. [27], though we  
 500 generalize it to the case where the  $K$  prompts may be different.

501 To give the formal definition, we first define some notation. Given a sequence  
 502 of  $K$  prompts  $\mathbf{x}^1, \dots, \mathbf{x}^K \in V^*$  (where  $V^*$  is the set of all finite sequences  
 503 in  $V$ ) and given a sequence of  $K$  responses  $\mathbf{y}^1, \dots, \mathbf{y}^K \in V^*$ , we write  
 504  $\mathbb{P}_{wm}(\mathbf{y}^i | \mathbf{x}^i, k; (\mathbf{x}^1, \mathbf{y}^1), \dots, (\mathbf{x}^{i-1}, \mathbf{y}^{i-1}))$  to denote the probability of the watermark-  
 505 ing scheme using watermarking key  $k$  generating response  $\mathbf{y}^i$  in response to prompt  
 506  $\mathbf{x}^i$ , given that the last  $i-1$  prompt/response pairs to be supplied to/generated by the  
 507 watermarked model are  $(\mathbf{x}^1, \mathbf{y}^1), \dots, (\mathbf{x}^{i-1}, \mathbf{y}^{i-1})$ . Then:

**Definition 20** (*K-sequence non-distortionary watermarking scheme*). *A watermark-  
 ing scheme  $\mathbb{P}_{wm}$  is K-sequence non-distortionary for some  $K \geq 1$  if, for any sequence  
 of  $K$  prompts  $\mathbf{x}^1, \dots, \mathbf{x}^K \in V^*$  and sequence of  $K$  responses  $\mathbf{y}^1, \dots, \mathbf{y}^K \in V^*$ :*

$$\mathbb{E}_{k \sim \text{Unif}(\mathcal{R})} \left[ \prod_{i=1}^K \mathbb{P}_{wm}(\mathbf{y}^i | \mathbf{x}^i, k; (\mathbf{x}^1, \mathbf{y}^1), \dots, (\mathbf{x}^{i-1}, \mathbf{y}^{i-1})) \right] = \prod_{i=1}^K p_{LM}(\mathbf{y}^i | \mathbf{x}^i).$$

508 This definition extends the notion of non-distortion from a single token (Definition 16)  
 509 to one or more consecutively-generated sequences. In particular, while Definition 16 is  
 510 a property of the sampling algorithm alone (such as Gumbel or Tournament sampling),  
 511 Definition 20 is a property of the whole watermarking scheme (which includes the  
 512 sampling algorithm, the random seed generator, and any other details of how the  
 513 watermarked LLM is operated across multiple queries).

514 We now show that by applying *K-sequence repeated context masking* (Methods  
 515 Section 5.6) with a non-distortionary sampling algorithm, we can construct a  $K$ -  
 516 sequence non-distortionary watermarking scheme:

517 **Theorem 21** (*K-sequence repeated context masking + non-distortionary sampling  
 518 algorithm  $\rightarrow$  K-sequence non-distortionary watermarking scheme*). *Let  $\mathcal{S}$  be a non-  
 519 distortionary sampling algorithm (Def 16). For any  $K \geq 1$ , let  $\mathbb{P}_{wm}$  denote the  
 520 watermarking scheme that applies  $\mathcal{S}$  with sliding window random seed generation and  
 521 K-sequence repeated context masking (Methods Algorithm 3). Then  $\mathbb{P}_{wm}$  is K-sequence  
 522 non-distortionary.*

523 *Proof.* See Supplementary Appendix K.7. □

524 In particular, Theorem 21 with Theorem 18 tells us that two-sample ( $N = 2$ ) Tourna-  
 525 ment sampling is  $K$ -sequence non-distortionary if applied with  $K$ -sequence repeated

526 context masking. The same is true for other non-distortionary sampling algorithms  
527 such as Gumbel sampling (Supplementary Appendix B.1.1).

### 528 G.3 Discussion

529 In this section we have defined several levels of non-distortion that a watermarking  
530 scheme may satisfy; from weakest to strongest they are:

- 531 • Single-token non-distortion (Definition 16)
- 532 • Single-sequence non-distortion (Definition 20 for  $K = 1$ )
- 533 •  $K$ -sequence non-distortion (Definition 20 for a particular integer  $K > 1$ )
- 534 • Infinite-sequence non-distortion (Definition 20 for  $K = \infty$ )

535 Single-token non-distortion can be achieved by using any non-distortionary sampling  
536 algorithm such as Gumbel sampling or Tournament sampling with  $N = 2$ ; however, in  
537 circumstances where high detectability is more important than quality preservation,  
538 one might choose to use a distortionary sampling algorithm such as Soft Red List or  
539 Tournament sampling with  $N > 2$ .

540 Single-sequence non-distortion is an important property as it guarantees that the  
541 quality of a watermarked response is on average the same as an unwatermarked  
542 response. In particular, a single-sequence non-distortionary watermarking scheme will  
543 not cause repeating loops or lower diversity *within* a response – a phenomenon which  
544 has been observed in schemes that lack single-sequence non-distortion (e.g., using a  
545 sliding window random seed generator without repeated context masking) [24, 25].  
546 A single-sequence non-distortionary watermarking scheme should match the unwater-  
547 marked model on any evaluation comprising measurements on individual responses,  
548 such as perplexity (Table C1), pairwise quality assessment (Extended Data Table 1),  
549 and other automatic benchmarks (Table C2). In our experiments with Gumbel and  
550  $N = 2$  Tournament sampling we use 1-sequence repeated context masking and so  
551 achieve single-sequence non-distortion.

552 While single-sequence non-distortion guarantees the quality of each individual  
553 response, it does not necessarily preserve diversity across multiple responses. This  
554 can be observed in Extended Data Figure 4, which shows that when sampling several  
555 responses to the same prompt, the similarity between the responses is greater for  
556 the watermarked responses than the unwatermarked responses. This could be prob-  
557 lematic in scenarios where inter-response diversity is important, or could lower the  
558 overall quality of a system which generates many responses then selects the best one.  
559 It could also be problematic from a security perspective, as an adversary might steal  
560 the watermark by detecting the repeated biases that appear across multiple responses  
561 [32].

562 If these concerns are particularly important, one can choose a watermarking scheme  
563 achieving  $K$ -sequence non-distortion for a larger  $K > 1$ ; however there are some  
564 trade-offs. The primary trade-off is detectability: if we apply  $K$ -sequence repeated  
565 context masking with larger  $K$  then the watermark will be masked more often, reduc-  
566 ing its detectability. Another trade-off is the computational complexity and storage  
567 requirements of maintaining the context history, particularly for large  $K$ . Ultimately,  
568 complete theoretical non-distortion (infinite-sequence non-distortion) can be achieved

569 by implementing infinite repeated context masking, but this is impractical from a  
 570 computational and detectability point of view.

## 571 Appendix H Analysis of watermarking strength

572 The intuition of Tournament sampling is that it returns a token that is likely to  
 573 have larger  $g$ -values; these high  $g$ -values are what is later measured when detecting  
 574 the watermark. The watermarking strength is related to how much higher these  $g$ -  
 575 values are for watermarked text compared to unwatermarked text. In this section we  
 576 quantify this bias, and first show that it is greater when we use more samples  $N$  in the  
 577 tournament. Second, we show the bias is greater when the LLM has high entropy (in  
 578 particular, collision entropy), but that each layer of watermarking reduces the entropy  
 579 of the distribution.

### 580 H.1 Notation

581 **Definition 22** (Collision probability). *Given a probability distribution  $p$ , the collision*  
 582 *probability  $C_p$  of  $p$  is the probability that two samples drawn i.i.d. from  $p$  are the same.*  
 583 *If  $p = (p_i)_{i=1}^N$  is discrete, the collision probability equals  $\sum_{i=1}^N p_i^2$ .*

584 Collision probability is related to *collision entropy*, sometimes called *Rényi entropy*,  
 585  $H_2(p) = -\log \sum_{i=1}^N p_i^2$ .

586 **Definition 23** (Higher-order collision probabilities). *Given a probability distribution*  
 587  *$p$  and integers  $N, j \geq 1$ , let  $C_p^{N,j}$  denote the probability that  $N$  samples drawn i.i.d.*  
 588 *from  $p$  have exactly  $j$  unique values. Note that  $C_p^{2,1}$  is the collision probability of  $p$ . In*  
 589 *general, we refer to  $C_p^{N,j}$  as the higher-order collision probabilities of  $p$ .*

**Definition 24** (Watermarked  $g$ -value distribution). *Given a probability distribution  $p$ ,*  
*a  $g$ -value distribution  $f_g$ , and number of samples  $N \geq 2$ , let  $F_{gw}$  denote the cumulative*  
*density function of the  $g$ -value of a token sampled from the single-layer watermarked*  
*distribution  $p_{wm}(\cdot|p, r, f_g, N, 1)$  (Definition 9), in expectation over the random seed  $r$ :*

$$F_{gw}(z) := \mathbb{P}_{r \sim \text{Unif}(\mathcal{R}), x \sim p_{wm}(\cdot|p, r, f_g, N, 1)} [g_1(x, r) \leq z].$$

590 Let  $f_{gw}$  denote the probability density/mass function corresponding to  $F_{gw}$ . We refer  
 591 to  $f_{gw}$  as the watermarked  $g$ -value distribution.

592 The watermarking strength of a single layer of Tournament sampling can therefore  
 593 be described as the distributional difference between the watermarked  $g$ -value dis-  
 594 tribution  $f_{gw}$  (which describes the expected  $g$ -value distribution of the watermarked  
 595 token) and the ‘unwatermarked’  $g$ -value distribution  $f_g$  (which describes the expected  
 596  $g$ -value distribution of the unwatermarked token).

597 **H.2 Watermarked  $g$ -value distribution**

598 The following theorem describes the watermarked  $g$ -value distribution  $f_{gw}$  in terms  
 599 of the unwatermarked  $g$ -value distribution  $f_g$  and the higher-order LLM collision  
 600 probabilities  $C_{p_{LM}}^{N,j}$ .

**Theorem 25** (Watermarked  $g$ -value distribution for single-layer tournament). *Given a probability distribution  $p_{LM}$ , a  $g$ -value distribution  $f_g$ , and number of samples  $N \geq 2$ , the c.d.f. of the watermarked  $g$ -value distribution  $F_{gw}$  is given by:*

$$F_{gw}(z) = \sum_{j=1}^N C_{p_{LM}}^{N,j} F_g(z)^j. \quad (\text{H24})$$

If  $f_g$  is continuous, the p.d.f. of the watermarked  $g$ -value distribution  $f_{gw}$  is given by:

$$f_{gw}(z) = f_g(z) \sum_{j=1}^N C_{p_{LM}}^{N,j} j F_g(z)^{j-1}. \quad (\text{H25})$$

If  $f_g$  is discrete, the p.m.f. of the watermarked  $g$ -value distribution  $f_{gw}$  is given by:

$$f_{gw}(z) = f_g(z) \sum_{j=1}^N C_{p_{LM}}^{N,j} \left( \sum_{k=1}^j (-1)^{k-1} \binom{j}{k} F_g(z)^{j-k} f_g(z)^{k-1} \right). \quad (\text{H26})$$

601 *Proof.* See Supplementary Appendix K.8. □

602 Theorem 25 shows that the watermarked  $g$ -value distribution depends on how  
 603 much collision entropy there is in the LLM distribution. In particular, Equation (H24)  
 604 says that the watermarked c.d.f.  $F_{gw}$  is a linear combination of powers of the unwa-  
 605 termarked c.d.f.  $F_g$ , with  $C_{p_{LM}}^{N,j}$  as the coefficients. If  $p_{LM}$  is high-entropy, then  
 606  $\{C_{p_{LM}}^{N,j}\}_{j=1,\dots,N}$  is more heavily weighted towards the larger values of  $j$ , and so  $F_{gw}$   
 607 is more weighted towards the higher powers of  $F_g$ ; this biases the distribution of the  
 608 watermarked  $g$ -value to be larger.

609 **H.2.1 Simplified formulations for special cases**

610 For certain special cases (e.g., choices of  $N$  or  $f_g$ ), Theorem 25 has simplified forms,  
 611 which we provide here.

**Corollary 26** (Watermarked  $g$ -value distribution for single-layer tournament, two samples). *If in Theorem 25 the number of samples  $N$  is equal to 2, then the c.d.f.  $F_{gw}$  is given by:*

$$F_{gw}(z) = C_{p_{LM}} F_g(z) + (1 - C_{p_{LM}}) F_g(z)^2. \quad (\text{H27})$$

If  $g$  is continuous, the p.d.f.  $f_{gw}$  is given by:

$$f_{gw}(z) = f_g(z) [C_{p_{LM}} + 2(1 - C_{p_{LM}})F_g(z)]. \quad (\text{H28})$$

If  $g$  is discrete, the p.m.f.  $f_{gw}$  is given by:

$$f_{gw}(z) = f_g(z) [C_{p_{LM}} + (1 - C_{p_{LM}})(2F_g(z) - f_g(z))]. \quad (\text{H29})$$

612 *Proof.* Follows from Theorem 25 and  $C_{p_{LM}}^{2,1} = C_{p_{LM}}$  and  $C_{p_{LM}}^{2,2} = 1 - C_{p_{LM}}$ .  $\square$

**Corollary 27** (Watermarked  $g$ -value distribution for single-layer tournament, two samples, Bernoulli  $g$ -value distribution). *If in Theorem 25 the number of samples  $N$  is equal to 2 and the  $g$ -value distribution  $f_g$  is Bernoulli( $q$ ) for some  $0 < q < 1$ , then the watermarked  $g$ -value distribution is given by the p.m.f.:*

$$f_{gw}(1) = q + q(1 - q)(1 - C_{p_{LM}}). \quad (\text{H30})$$

In particular, if  $q = 0.5$  then:

$$f_{gw}(1) = \frac{1}{2} + \frac{1}{4}(1 - C_{p_{LM}}).$$

613 *Proof.* This follows from Equation (H29) in Corollary 26.  $\square$

614 Equation (H30) shows that for a Bernoulli  $g$ -value distribution, the expected  
615 watermarked  $g$ -value  $f_{gw}(1)$  is greater than the expected unwatermarked  $g$ -value  
616 (which is  $q$ ); furthermore, it increases linearly with the LLM's non-collision probability  
617  $(1 - C_{p_{LM}})$ .

**Corollary 28** (Watermarked  $g$ -value distribution for single-layer tournament, two samples, Uniform  $g$ -value distribution). *If in Theorem 25 the number of samples  $N$  is equal to 2 and the  $g$ -value distribution  $f_g$  is Uniform $[0,1]$ , then the watermarked  $g$ -value distribution is given by the p.d.f.:*

$$f_{gw}(z) = C_{p_{LM}} + 2(1 - C_{p_{LM}})z \quad \forall 0 \leq z \leq 1.$$

Furthermore the expected watermarked  $g$ -value is:

$$\mathbb{E}_{r \sim \text{Unif}(\mathcal{R}), x \sim p_{wm}(\cdot | p, r, f_g, 2, 1)} [g_1(x, r)] = \frac{1}{2} + \frac{1}{6}(1 - C_{p_{LM}}). \quad (\text{H31})$$

*Proof.* The p.d.f. follows from Equation (H28) in Corollary 26. The expected value follows from integrating:

$$\int_0^1 z f_{gw}(z) dz = \int_0^1 C_{p_{LM}} z + 2(1 - C_{p_{LM}})z^2 dz$$

$$\begin{aligned}
&= \frac{C_{p_{LM}}}{2} + \frac{2(1 - C_{p_{LM}})}{3} \\
&= \frac{1}{2} + \frac{1}{6}(1 - C_{p_{LM}}).
\end{aligned}$$

618

□

619 Equation (H31) shows that for a Uniform  $g$ -value distribution, the expected water-  
620 marked  $g$ -value is greater than the expected unwatermarked  $g$ -value (which is  $\frac{1}{2}$ ); and  
621 it increases linearly with the LLM's non-collision probability  $(1 - C_{p_{LM}})$ .

### 622 H.3 Stronger watermarking with larger $N$

623 Theorem 25 shows that watermarking strength depends on the number of samples  $N$   
624 used in the tournament. In this section we provide two results about how watermarking  
625 strength changes as  $N$  increases: First, Theorem 29 shows that, provided there is some  
626 entropy in the LLM distribution, a single layer of Tournament sampling using  $N + 1$   
627 samples provides greater watermarking strength than one using  $N$  samples. Then,  
628 Corollary 30 shows that, provided the LLM distribution has sufficiently large support,  
629 we can achieve arbitrarily high watermarking strength by increasing the number of  
630 samples  $N$ .

**Theorem 29** ( $g$ -value bias increases with  $N$ , single-layer tournament). *Given a probability distribution  $p_{LM}$  and  $g$ -value distribution  $f_g$ , let  $F_{gw}^N$  be the c.d.f. of the watermarked  $g$ -value distribution for a single-layer tournament with  $N$  samples. Let  $F_{gw}^{N+1}$  be the same for a single-layer tournament with  $N + 1$  samples. Then for all  $z$ :*

$$F_{gw}^{N+1}(z) \leq F_{gw}^N(z).$$

631 When  $0 < F_{gw}^N(z) < 1$ , equality holds iff  $p_{LM}$  is one-hot.

632 *Proof.* See Supplementary Appendix K.9. □

633 **Corollary 30** (Watermarked  $g$ -value distribution for single-layer tournament as  
634  $N \rightarrow \infty$ ). *Given a probability distribution  $p_{LM}$  and  $g$ -value distribution  $f_g$ : for all  $z$ ,  
635 the c.d.f. of the watermarked  $g$ -value distribution  $F_{gw}(z) \rightarrow F_g(z)^V$  as  $N \rightarrow \infty$ , where  
636  $V$  is the size of the support of  $p_{LM}$ .*

*Proof.* Equation (H24) gives us:

$$F_{gw}(z) = \sum_{j=1}^N C_{p_{LM}}^{N,j} F_g(z)^j.$$

637 For  $N > V$ ,  $C_{p_{LM}}^{N,j} = 0$  for all  $j > V$ . Furthermore as  $N \rightarrow \infty$ ,  $C_{p_{LM}}^{N,V} \rightarrow 1$  and  $C_{p_{LM}}^{N,j} \rightarrow 0$   
638 for all  $j \leq V - 1$ . It follows that  $F_{gw}(z) \rightarrow F_g(z)^V$ . □

639 **H.4 Entropy analysis for  $N = 2$**

640 Corollary 26 shows that for  $N = 2$  samples, the watermarking strength of a single layer  
 641 of Tournament sampling depends on the collision probability of the input distribution.  
 642 For a multi-layer tournament, this means that the watermarking strength of each layer  
 643 depends on the collision probability of the previous layer. In this section we show  
 644 that the expected collision probability increases (and so the expected watermarking  
 645 strength of each layer decreases) with each added layer.

646 First, in Theorem 31 we derive the expected collision probability of the single-  
 647 layer watermarked distribution; then in Theorem 32 we show this is greater than the  
 648 collision probability of the input distribution.

**Theorem 31** (Expected collision probability for single-layer tournament, two sam-  
 ples). *Given a probability distribution  $p_{LM}$ , random seed  $r \in \mathcal{R}$  and  $g$ -value  
 distribution  $f_g$ , let  $C_{p_{wm}}^{2,1}$  denote the collision probability of the watermarked distribu-  
 tion  $p_{wm}(\cdot|p_{LM}, r, f_g, 2, 1)$  for a  $N = 2$  sample single-layer tournament. In expectation  
 over the random seed  $r$ , the collision probability is:*

$$\begin{aligned} \mathbb{E}_{r \sim \text{Unif}(\mathcal{R})} [C_{p_{wm}}^{2,1}] &= \left[ \frac{4}{3} - \frac{1}{3} C_{f_g}^{3,1} \right] C_{p_{LM}}^{2,1} + \left[ \frac{2}{3} + \frac{1}{3} C_{f_g}^{3,1} - C_{f_g}^{2,1} \right] (C_{p_{LM}}^{2,1})^2 \\ &\quad - \left[ \frac{2}{3} - \frac{2}{3} C_{f_g}^{3,1} \right] C_{p_{LM}}^{3,1} - \left[ \frac{1}{3} + \frac{2}{3} C_{f_g}^{3,1} - C_{f_g}^{2,1} \right] C_{p_{LM}}^{4,1}. \end{aligned} \quad (\text{H32})$$

649 where  $C_{p_{LM}}^{N,j}$  and  $C_g^{N,j}$  are the higher order collision probabilities (Def 23), respectively,  
 650 of  $p_{LM}$  and  $f_g$ .

651 *Proof.* See Supplementary Appendix K.10. □

652 **Theorem 32** (Single-layer tournament increases the expected collision probabili-  
 653 ty, two samples). *The expected collision probability of a single-layer tournament  
 654 with  $N = 2$  samples is greater than or equal to the LLM collision probability:  
 655  $\mathbb{E}_{r \sim \text{Unif}(\mathcal{R})} [C_{p_{wm}}^{2,1}] \geq C_{p_{LM}}^{2,1}$ , with equality iff  $p_{LM}$  is one-hot.*

656 *Proof.* See Supplementary Appendix K.11. □

In the case of a multi-layer tournament, Theorem 32 says that the sequence of  $m$   
 watermarked distributions (see Definition 9):

$$p_{wm}(\cdot|p_{LM}, r, f_g, 2, 1), \quad p_{wm}(\cdot|p_{LM}, r, f_g, 2, 2), \quad \dots, \quad p_{wm}(\cdot|p_{LM}, r, f_g, 2, m)$$

657 have (in expectation over  $r$ ) increasing collision probability (i.e., decreasing collision  
 658 entropy). Thus the amount of watermarking strength contributed by each new layer  
 659 decreases. For the tournament as a whole, this implies that increasing the number of  
 660 layers  $m$  may give diminishing returns in terms of overall watermarking strength.

661 **H.4.1 Effect of  $g$ -value distribution  $f_g$**

662 Now turning to the particular choice of  $f_g$ , the following result shows that a Uni-  
 663 form[0,1] layer raises the collision probability of the next layer (and so reduces its  
 664 watermarking strength) more than a Bernoulli(0.5) layer does. This suggests a natu-  
 665 ral trade-off: while a single Uniform layer provides more watermarking strength than  
 666 a single Bernoulli layer, it also more greatly reduces the amount of entropy available  
 667 to be used by subsequent layers.

**Corollary 33** (Expected collision probability for single-layer tournament, two sam-  
 ples, Bernoulli(0.5) or Uniform(0,1)  $g$ -value distribution). *If  $f_g = \text{Bernoulli}(0.5)$  then  
 Equation (H32) equals:*

$$\mathbb{E}_{r \sim \text{Unif}(\mathcal{R})} [C_{p_{wm}}^{2,1}] = \frac{5}{4}C_{p_{LM}}^{2,1} + \frac{1}{4} (C_{p_{LM}}^{2,1})^2 - \frac{1}{2}C_{p_{LM}}^{3,1}. \quad (\text{H33})$$

If  $f_g = \text{Uniform}[0, 1]$  then Equation (H32) equals:

$$\mathbb{E}_{r \sim \text{Unif}(\mathcal{R})} [C_{p_{wm}}^{2,1}] = \frac{4}{3}C_{p_{LM}}^{2,1} + \frac{2}{3} (C_{p_{LM}}^{2,1})^2 - \frac{2}{3}C_{p_{LM}}^{3,1} - \frac{1}{3}C_{p_{LM}}^{4,1}. \quad (\text{H34})$$

668 Furthermore, for any distribution  $p_{LM}$ ,  $\mathbb{E}_{r \sim \text{Unif}(\mathcal{R})} [C_{p_{wm}}^{2,1}]$  is greater for  $f_g =$   
 669  $\text{Uniform}[0, 1]$  than for  $f_g = \text{Bernoulli}(0.5)$ .

*Proof.* For Equation (H33), substitute  $C_{f_g}^{2,1} = \frac{1}{2}$  and  $C_{f_g}^{3,1} = \frac{1}{4}$  into Equation (H32).  
 For Equation (H34), substitute  $C_{f_g}^{2,1} = C_{f_g}^{3,1} = 0$ . Now the difference:

$$\begin{aligned} & \mathbb{E}_{r \sim \text{Unif}(\mathcal{R})} [C_{p_{wm}, \text{Unif}}^{2,1}] - \mathbb{E}_{r \sim \text{Unif}(\mathcal{R})} [C_{p_{wm}, \text{Ber}}^{2,1}] \\ &= \frac{1}{12}C_{p_{LM}}^{2,1} + \frac{5}{12} (C_{p_{LM}}^{2,1})^2 - \frac{1}{6}C_{p_{LM}}^{3,1} - \frac{1}{3}C_{p_{LM}}^{4,1} \\ &\geq \frac{1}{12}C_{p_{LM}}^{2,1} + \frac{5}{12} (C_{p_{LM}}^{2,1})^2 - \frac{1}{6} \left( \frac{1}{2}C_{p_{LM}}^{2,1} (1 + C_{p_{LM}}^{2,1}) \right) - \frac{1}{3} (C_{p_{LM}}^{2,1})^2 \quad (\text{Lemma 44}) \\ &= 0. \quad (\text{simplify}) \end{aligned}$$

670

□

671 **H.5 Discussion**

672 As shown in Supplementary Appendix H.4, the amount of watermarking evidence con-  
 673 tributed by each layer decreases as more layers are added. Consequently, if we keep  
 674 adding layers to a multi-layer tournament, at some point the noise outweighs the signal,  
 675 and the detectability of the watermark begins to degrade. However, the optimal num-  
 676 ber of layers depends on the particular collision probabilities of the LLM distribution,  
 677 which itself varies step-to-step and also depends on the prompt distribution. For our  
 678 experiments, we determine the optimal number of layers empirically (Supplementary  
 679 Appendix C.1).



680 The choice of the  $g$ -value distribution  $f_g$  used in Tournament sampling (Meth-  
681 ods Definition 3) also plays a key role in the detectability of the watermark. In  
682 Supplementary Appendix H.4 we showed theoretically that while a single layer with  
683  $f_g = \text{Uniform}[0, 1]$  provides more watermarking evidence than a single layer with  
684  $f_g = \text{Bernoulli}(0.5)$ , on the other hand the Uniform layer more greatly reduces the  
685 amount of entropy available in the output distribution, meaning that subsequent layers  
686 have lower watermarking strength. Intuitively, this means that with Uniform, Tour-  
687 nament sampling can apply a few layers of strong watermarking, and with Bernoulli,  
688 Tournament sampling can apply many layers of weak watermarking. This corresponds  
689 with our empirical observations that for shallow tournaments (small number of layers),  
690 Uniform generally outperforms Bernoulli in terms of overall watermark detectability,  
691 while for deeper tournaments, Bernoulli outperforms Uniform. If we are free to choose  
692 any number of layers, we find that overall the best watermark detectability is usually  
693 achieved with many layers of weak Bernoulli watermarking, rather than fewer layers  
694 of strong Uniform watermarking.

## 695 Appendix I Generative watermarking with 696 speculative sampling

697 Speculative sampling [5] is an algorithm designed to speed up sampling text from  
698 a large target LLM  $q$ , by using a smaller draft LLM  $p$ . As speculative sampling is  
699 commonly used in production, we wish to combine speculative sampling with gener-  
700 ative watermarking. In this section we introduce speculative sampling, then discuss  
701 the desired properties of a combined solution; finally we present two algorithms  
702 for combining a generative watermark (such as SYNTHID-TEXT) with speculative  
703 sampling.

### 704 I.1 Speculative sampling

705 The algorithm for speculative sampling is presented in Algorithm 4.<sup>3</sup>  
706 Algorithm 4 uses the  $(\cdot)_+$  operator on Line 13, which is defined as:

**Definition 34** ( $(\cdot)_+$  operator).

$$(f(x))_+ := \frac{\max(0, f(x))}{\sum_{x'} \max(0, f(x'))}.$$

707 In Algorithm 4, the draft LLM’s suggestions are either accepted or rejected by the  
708 target LLM. This is the *acceptance rate*:

---

<sup>3</sup>Algorithm 4 is the same as the algorithm in [5], though we fix some minor notational confusion in the original incrementing both  $n$  and  $t$ . It also overloads  $t$  as both the prompt length and the iterator from 1 to  $K$ ; but we keep this to be consistent with the original.

---

**ALGORITHM 4** Speculative sampling [5]

---

```
1: Given lookahead  $K$ , minimum target sequence length  $T$ , target model  $q(\cdot|\cdot)$ , draft
   model  $p(\cdot|\cdot)$ , initial prompt sequence  $x_1, \dots, x_t$ .
2: Initialize  $n \leftarrow t$ .
3: while  $n < T$  do
4:   for  $t = 1 : K$  do
5:     Sample draft auto-regressively  $\tilde{x}_t \sim p(\cdot|x_{1:n}, \tilde{x}_{1:t-1})$ 
6:   end for
7:   In parallel, compute  $K + 1$  sets of logits from drafts  $\tilde{x}_1, \dots, \tilde{x}_K$  :
      $q(\cdot|x_{1:n}), q(\cdot|x_{1:n}, \tilde{x}_1), \dots, q(\cdot|x_{1:n}, \tilde{x}_{1:K})$ 
8:   for  $t = 1 : K$  do
9:     Sample  $r \sim U[0, 1]$  from a uniform distribution.
10:    if  $r < \min(1, q(\tilde{x}_t|x_{1:n})/p(\tilde{x}_t|x_{1:n}))$  then
11:      Set  $x_{n+1} \leftarrow \tilde{x}_t$  and  $n \leftarrow n + 1$ .
12:    else
13:      Sample  $x_{n+1} \sim (q(\cdot|x_{1:n}) - p(\cdot|x_{1:n}))_+$  and set  $n \leftarrow n + 1$  and exit for loop.
14:    end if
15:  end for
16:  If all tokens  $\tilde{x}_1, \dots, \tilde{x}_K$  are accepted, sample extra token  $x_{n+1} \sim q(\cdot|x_{1:n})$  and
   set  $n \leftarrow n + 1$ .
17: end while
```

---

**Definition 35** (acceptance rate). *Given text so far  $x_{1:n}$ , the acceptance rate of Algorithm 4 is the probability of accepting the draft model’s token  $x_{n+1}$  on line 11:*

$$\text{acceptance rate} = \sum_{x_{n+1} \in V} p(x_{n+1}|x_{1:n}) \min\left(1, \frac{q(x_{n+1}|x_{1:n})}{p(x_{n+1}|x_{1:n})}\right).$$

709 Intuitively, the closer  $p$  is to  $q$ , the higher the acceptance rate is likely to be. A high  
710 acceptance rate is desirable as it speeds up the sampling process.

711 Lastly, we highlight a core property of speculative sampling, which is that it is  
712 equivalent to sampling from the target distribution:

713 **Theorem 36** (Speculative sampling is equivalent to target distribution). *The output*  
714 *probability distribution of Algorithm 4 given the prompt  $x_1, \dots, x_t$  is equal to the target*  
715 *distribution  $q(\cdot|x_1, \dots, x_t; k)$ .*

716 *Proof.* See Chen et al. [5]. □

## 717 I.2 Desiderata

718 We would like to design a *generative watermarking with speculative sampling* algorithm  
719 to generate text while applying both speculative sampling and a generative water-  
720 marking scheme. Ideally, such an algorithm should satisfy the following desiderata:

- 721 1. **Non-distortionary** The generative watermarking with speculative sampling algo-  
722 rithm should have the same non-distortion properties as the underlying generative  
723 watermarking scheme (see Supplementary Appendix G).
- 724 2. **Preserve acceptance rate** The acceptance rate (the rate at which tokens from  
725 the draft LLM are accepted) should be the same for speculative sampling with  
726 watermarking and speculative sampling without watermarking.
- 727 3. **Preserve watermark detectability** The watermark detection performance  
728 should be the same for watermarking with speculative sampling, and watermarking  
729 the target LLM without speculative sampling.

730 In the following sections we provide two *generative watermarking with speculative sam-*  
731 *pling* algorithms, both of which are non-distortionary. First, we provide a method  
732 which preserves watermark detectability, but it may reduce the acceptance rate; we  
733 call this algorithm **high-detectability watermarked speculative sampling**. For  
734 latency-critical applications where high acceptance rate is important, we provide  
735 an alternative method which preserves acceptance rate, but may reduce watermark  
736 detectability; we call it **fast watermarked speculative sampling**.

### 737 I.3 Compatibility with generative watermarking schemes

738 Our two algorithms can generally be used with most generative watermarking schemes,  
739 with two important caveats:

- 740 1. For the ‘preserve acceptance rate’ property to hold in the **fast watermarked**  
741 **speculative sampling** algorithm, the watermarking scheme’s sampling algorithm  
742  $\mathcal{S}$  must be *single-token non-distortionary* (Definition 16) – e.g., Gumbel sampling  
743 or two-sample Tournament sampling.
- 744 2. The **high-detectability watermarked speculative sampling** algorithm  
745 requires that the sampling algorithm  $\mathcal{S}$  is *vectorisable*; i.e., given any probability  
746 distribution  $p$  and random seed  $r$ , it is possible to directly compute the watermarked  
747 probability distribution  $\mathbb{P}[\mathcal{S}(p, r) = \cdot]$ . For Tournament sampling, this means that  
748 we need to use the vectorised implementation (Supplementary Appendix E).

### 749 I.4 High-detectability watermarked speculative sampling

750 This algorithm uses the straightforward approach of taking Algorithm 4 and replacing  
751 the draft distribution and the target distribution with their watermarked versions.  
752 The watermark detection method is then the same as for the underlying generative  
753 watermarking scheme. We first define some notation, then present the method in  
754 Algorithm 5.

**Definition 37 .** *Given a watermarking sampling algorithm  $\mathcal{S} : \Delta V \times \mathcal{R} \rightarrow V$  (see  
Methods Definition 5), a watermarking key  $k \in \mathcal{R}$ , and a random seed generator  $f_r$   
(see Methods Section 5.3), we use the following notation to refer to the watermarked  
versions of the target distribution  $q$  and the draft distribution  $p$ :*

$$p_{wm}(x_t|x_{<t}; k) := \mathbb{P}[\mathcal{S}(p(\cdot|x_{<t}), f_r(x_{<t}, k)) = x_t]$$

$$q_{wm}(x_t|x_{<t};k) := \mathbb{P}[\mathcal{S}(q(\cdot|x_{<t}), f_r(x_{<t}, k)) = x_t].$$

755 Note that Algorithm 5 requires directly computing the probabilities/logits from  
756 the watermarked distributions  $p_{wm}$  and  $q_{wm}$  rather than just sampling from them; this  
757 is the reason why  $\mathcal{S}$  must be vectorisable (Supplementary Appendix I.3).

---

**ALGORITHM 5** High-detectability watermarked speculative sampling

---

```

1: Given lookahead  $K$ , minimum target sequence length  $T$ , watermarked target
   model  $q_{wm}(\cdot|k)$ , watermarked draft model  $p_{wm}(\cdot|k)$ , initial prompt sequence
    $x_1, \dots, x_t$ .
2: Initialize  $n \leftarrow t$ .
3: while  $n < T$  do
4:   for  $t = 1 : K$  do
5:     Sample draft auto-regressively  $\tilde{x}_t \sim p_{wm}(\cdot|x_{1:n}, \tilde{x}_{1:t-1}; k)$ 
6:   end for
7:   In parallel, compute  $K + 1$  sets of logits from drafts  $\tilde{x}_1, \dots, \tilde{x}_K$  :
    $q_{wm}(\cdot|x_{1:n}; k), q_{wm}(\cdot|x_{1:n}, \tilde{x}_1; k), \dots, q_{wm}(\cdot|x_{1:n}, \tilde{x}_{1:K}; k)$ 
8:   for  $t = 1 : K$  do
9:     Sample  $r \sim U[0, 1]$  from a uniform distribution.
10:    if  $r < \min(1, q_{wm}(\tilde{x}_t|x_{1:n}; k)/p_{wm}(\tilde{x}_t|x_{1:n}; k))$  then
11:      Set  $x_{n+1} \leftarrow \tilde{x}_t$  and  $n \leftarrow n + 1$ .
12:    else
13:      Sample  $x_{n+1} \sim (q_{wm}(\cdot|x_{1:n}; k) - p_{wm}(\cdot|x_{1:n}; k))_+$  and set  $n \leftarrow n + 1$  and
      exit for loop.
14:    end if
15:  end for
16:  If all tokens  $\tilde{x}_1, \dots, \tilde{x}_K$  are accepted, sample extra token  $x_{n+1} \sim q_{wm}(\cdot|x_{1:n}; k)$ 
   and set  $n \leftarrow n + 1$ .
17: end while

```

---

758 **I.4.1 Properties**

759 In this section we show that Algorithm 5 preserves watermark detectability and is non-  
760 distortionary but decreases acceptance rate. First we establish the following theorem,  
761 which says that generating text from Algorithm 5 is equivalent to generating text from  
762 the watermarked target LLM without speculative sampling.

763 **Theorem 38** (Algorithm 5 is equivalent to watermarked target distribution). *The*  
764 *output probability distribution of Algorithm 5 given the prompt  $x_1, \dots, x_t$  is equal to*  
765 *the watermarked target distribution  $q_{wm}(\cdot|x_1, \dots, x_t; k)$ .*

766 *Proof.* Follows from Theorem 36. □

767 It follows trivially from Theorem 38 that as Algorithm 5 is equivalent to generating  
768 text directly from the target LLM  $q$  watermarked with  $\mathcal{S}$  and  $f_r$ , the watermark  
769 detection performance is also identical (for any detection method).

770 It also follows that Algorithm 5 inherits all non-distortion properties of the gener-  
771 ative watermarking scheme; in particular, if  $\mathcal{S}$  is single-token non-distortionary, then  
772 so is Algorithm 5. Furthermore if the generative watermarking scheme is  $K$ -sequence  
773 non-distortionary (Definition 20), for example by applying repeated context masking,  
774 then so is Algorithm 5 (assuming the repeated context masking is applied in the same  
775 way).

776 **Theorem 39** (Algorithm 5 has expected acceptance rate  $\leq$  speculative sam-  
777 pling without watermarking). *Assume the sampling algorithm  $\mathcal{S}$  is single-token  
778 non-distortionary (Definition 16). Given  $x_{1:n}$ , the acceptance rate of Algorithm 5  
779 (speculative sampling with watermarking) on step  $n + 1$  is, in expectation over the  
780 watermarking key  $k$ , less than or equal to the acceptance rate for speculative sampling  
781 without watermarking (Definition 35).*

782 *Proof.* See Supplementary Appendix K.12. □

## 783 I.5 Fast watermarked speculative sampling

784 For this method, we use two watermarking keys: one key  $k^D$  for sampling from the  
785 draft model and one key  $k^T$  for sampling from the target model (and for sampling when  
786 the draft tokens are rejected). We show this allows us to preserve acceptance rate, but  
787 it weakens watermark detection performance because during detection we must use  
788 a scoring function that checks all tokens against both keys (the scoring functions are  
789 described in Supplementary Appendix I.5.2). We now introduce some notation then  
790 present the algorithm in Algorithm 6.

**Definition 40 .** *Given a watermarking sampling algorithm  $\mathcal{S} : \Delta V \times \mathcal{R} \rightarrow V$  (see  
Methods Definition 5), watermarking keys  $k^D$  and  $k^T$ , and a random seed generator  
 $f_r$  (see Methods Section 5.3), we use the following notation:*

$$\begin{aligned} p_{wm}(x_t|x_{<t}; k^D) &:= \mathbb{P} [\mathcal{S} (p(\cdot|x_{<t}), f_r(x_{<t}, k^D)) = x_t] \\ q_{wm}(x_t|x_{<t}; k^T) &:= \mathbb{P} [\mathcal{S} (q(\cdot|x_{<t}), f_r(x_{<t}, k^T)) = x_t] \\ (q - p)_+^{wm}(x_t|x_{<t}; k^T) &:= \mathbb{P} [\mathcal{S} ([q(\cdot|x_{<t}) - p(\cdot|x_{<t})]_+, f_r(x_{<t}, k^T)) = x_t] \end{aligned}$$

791 where  $(\cdot)_+$  is the operator defined in Definition 34.

792 Note that Algorithm 6 does not require direct computation of the watermarked  
793 probabilities  $p_{wm}$ ,  $q_{wm}$  or  $(q - p)_+^{wm}$ ; it only requires sampling from them. This is why  
794 Algorithm 6 does not require  $\mathcal{S}$  to be vectorisable (Supplementary Appendix I.3).

### 795 I.5.1 Properties

796 We now show that Algorithm 6 is non-distortionary and preserves acceptance rate.

---

**ALGORITHM 6** Fast watermarked speculative sampling

---

```
1: Given lookahead  $K$ , minimum target sequence length  $T$ , auto-regressive target
   model  $q(\cdot|\cdot)$ , auto-regressive draft model  $p(\cdot|\cdot)$ , initial prompt sequence  $x_1, \dots, x_t$ ,
   watermarked models  $p_{\text{wm}}(\cdot|\cdot; k^D)$ ,  $q_{\text{wm}}(\cdot|\cdot; k^T)$ ,  $(q - p)_+^{\text{wm}}(\cdot|\cdot; k^T)$ .
2: Initialize  $n \leftarrow t$ .
3: while  $n < T$  do
4:   for  $t = 1 : K$  do
5:     Sample draft auto-regressively  $\tilde{x}_t \sim p_{\text{wm}}(\cdot|x_{1:n}, \tilde{x}_{1:t-1}; k^D)$ 
6:   end for
7:   In parallel, compute  $K + 1$  sets of logits from drafts  $\tilde{x}_1, \dots, \tilde{x}_K$  :
    $q(\cdot|x_{1:n})$ ,  $q(\cdot|x_{1:n}, \tilde{x}_1)$ ,  $\dots$ ,  $q(\cdot|x_{1:n}, \tilde{x}_{1:K})$ 
8:   for  $t = 1 : K$  do
9:     Sample  $r \sim U[0, 1]$  from a uniform distribution.
10:    if  $r < \min(1, q(\tilde{x}_t|x_{1:n})/p(\tilde{x}_t|x_{1:n}))$  then
11:      Set  $x_{n+1} \leftarrow \tilde{x}_t$  and  $n \leftarrow n + 1$ .
12:    else
13:      Sample  $x_{n+1} \sim (q - p)_+^{\text{wm}}(\cdot|x_{1:n}; k^T)$ , and set  $n \leftarrow n + 1$  and exit for loop.
14:    end if
15:  end for
16:  If all tokens  $\tilde{x}_1, \dots, \tilde{x}_K$  are accepted, sample extra token  $x_{n+1} \sim q_{\text{wm}}(\cdot|x_{1:n}; k^T)$ 
   and set  $n \leftarrow n + 1$ .
17: end while
```

---

**Theorem 41** (Algorithm 6 is single-token non-distortionary<sup>4</sup>). *Assume the sampling algorithm  $\mathcal{S}$  is single-token non-distortionary (Definition 16). Given  $x_{1:n}$ , let  $q'(\cdot|x_{1:n}; k^D, k^T)$  denote the probability distribution of the next token  $x_{n+1}$  generated by Algorithm 6 on step  $n + 1$ . For all  $x_{n+1} \in V$ :*

$$\mathbb{E}_{k^D \sim \text{Unif}(\mathcal{R}), k^T \sim \text{Unif}(\mathcal{R})} [q'(x_{n+1}|x_{1:n}; k^D, k^T)] = q(x_{n+1}|x_{1:n}).$$

797 *Proof.* See Supplementary Appendix K.13. □

798 If the watermarking scheme has a stronger level of non-distortion (e.g.  $K$ -sequence  
799 non-distortion, Definition 20), for example via repeated context masking, then we can  
800 correspondingly extend Theorem 41 to show the same level of non-distortion, in a  
801 similar way to Theorem 21.

802 **Theorem 42** (Algorithm 6 preserves acceptance rate). *Assume the sampling algo-*  
803 *rithm  $\mathcal{S}$  is single-token non-distortionary (Definition 16). Given  $x_{1:n}$ , the acceptance*  
804 *rate of Algorithm 6 (fast speculative sampling with watermarking) is, in expectation*  
805 *over the keys  $k^D, k^T$ , equal to the acceptance rate of speculative sampling without*  
806 *watermarking (Definition 35).*

---

<sup>4</sup>For notational convenience we prove single-token non-distortion in expectation over the watermarking keys  $k^D, k^T$ , but we could also prove non-distortion over the corresponding random seeds, which more closely matches Definition 16.

807 *Proof.* See Supplementary Appendix K.14. □

## 808 I.5.2 Scoring functions

809 In Algorithm 6, each generated token  $x_t$  is watermarked with either the draft key  $k^D$   
 810 or the target key  $k^T$ , but when it comes time to detect the watermark in a piece of text,  
 811 we do not know which key was used for each token. This necessitates checking each  
 812 token against both keys, but half of all these checks will follow an ‘unwatermarked’  
 813 distribution; this is the reason why Algorithm 6 has a lower detection performance  
 814 than watermarking without speculative sampling.

815 Nevertheless, in this section we provide adaptations of our scoring functions for  
 816 SYNTHID-TEXT presented in Supplementary Appendix A. Similarly to Supplementary  
 817 Appendix A.1, let  $g^D = \{g_{t,\ell}^D\}_{1 \leq t \leq T, 1 \leq \ell \leq m}$  denote the  $g$ -values computed with the draft  
 818 key  $k^D$  and similarly  $g^T$  denote the  $g$ -values computed with the target key  $k^T$ .

### 819 *(Weighted) Mean*

For the (Weighted) Mean Score (Equation (A2)) we simply sum over  $g^D$  and  $g^T$ :

$$\text{WeightedMeanScore}(x, \alpha) := \frac{1}{2mT} \sum_{\gamma=D,T} \sum_{t=1}^T \sum_{\ell=1}^m \alpha_\ell g_{t,\ell}^\gamma.$$

### 820 *(Weighted) Frequentist*

Similarly for the (Weighted) Frequentist Score (Equation (A5)), we consider the sum  
 $\frac{1}{2T} \sum_{\gamma=D,T} \sum_{t=1}^T \sum_{\ell=1}^m \alpha_\ell g_{t,\ell}^\gamma$ , which follows the  $\text{Normal}(\mu, \frac{\sigma^2}{2T})$  distribution under  
 the null hypothesis, where  $\mu$  and  $\sigma$  are defined as previously in Supplementary  
 Appendix A.3.1. Thus:

$$p\text{-value} = 1 - \text{CDF}_{\text{Normal}(\mu, \frac{\sigma^2}{2T})} \left( \frac{1}{2T} \sum_{\gamma=D,T} \sum_{t=1}^T \sum_{\ell=1}^m \alpha_\ell g_{t,\ell}^\gamma \right).$$

### 821 *Bayesian*

For the Bayesian approach in Supplementary Appendix A.4, we can replace the pos-  
 teriors  $P(w|g)$  and  $P(\neg w|g)$  with  $P(w|g^D, g^T)$  and  $P(\neg w|g^D, g^T)$  and similarly the  
 likelihoods  $P(g|w)$  and  $P(g|\neg w)$  with  $P(g^D, g^T|w)$  and  $P(g^D, g^T|\neg w)$ . To compute  
 the BayesianScore (Equation (A6)), we need to derive the likelihoods  $P(g_{t,\ell}^D, g_{t,\ell}^T|\neg w)$   
 and  $P(g_{t,\ell}^D, g_{t,\ell}^T|w)$ . For the unwatermarked likelihoods, we have independence of the  
 $g$ -values for the two keys, so:

$$P(g_{t,\ell}^D, g_{t,\ell}^T|\neg w) = P(g_{t,\ell}^D|\neg w)P(g_{t,\ell}^T|\neg w) = f_g(g_{t,\ell}^D)f_g(g_{t,\ell}^T).$$

For the watermarked likelihoods, we marginalize over the key  $k_t$  used on step  $t$ :

$$P(g_{t,\ell}^D, g_{t,\ell}^T|w) = \sum_{\gamma \in D,T} P(g_{t,\ell}^D, g_{t,\ell}^T|k_t = k^\gamma)P(k_t = k^\gamma)$$

| Temp. | Spec. sampling,<br>unwatermarked | Fast watermarked speculative sampling<br>+ non-distortionary SYNTHID-TEXT |                      |                                |                                | No spec. sampling +<br>non-dist. SYNTHID-TEXT |                         |            |
|-------|----------------------------------|---------------------------------------------------------------------------|----------------------|--------------------------------|--------------------------------|-----------------------------------------------|-------------------------|------------|
|       |                                  | Acceptance<br>rate ↑                                                      | Acceptance<br>rate ↑ | Scoring<br>function            | TPR@FPR=1% ↑                   |                                               | TPR@FPR=1% ↑            |            |
|       |                                  |                                                                           |                      |                                | 200 tokens                     | 400 tokens                                    | 200 tokens              | 400 tokens |
| 0.7   | 1.486                            | 1.495                                                                     | Weighted-Mean        | 14.33<br>[14.19, 14.47]        | 34.15<br>[33.80, 34.49]        |                                               |                         |            |
|       |                                  |                                                                           | Bayesian             | <b>54.66</b><br>[54.42, 54.90] | <b>60.35</b><br>[59.93, 60.77] | 69.64<br>[69.48, 69.81]                       | 86.64<br>[86.42, 86.85] |            |
| 1.0   | 1.513                            | 1.514                                                                     | Weighted-Mean        | 31.62<br>[31.42, 31.83]        | 61.89<br>[61.61, 62.17]        |                                               |                         |            |
|       |                                  |                                                                           | Bayesian             | <b>59.10</b><br>[58.95, 59.23] | <b>65.24</b><br>[65.02, 65.47] | 87.39<br>[87.29, 87.48]                       | 97.52<br>[97.47, 97.57] |            |

**Table I5:** Results for our novel *fast watermarked speculative sampling* algorithm which combines speculative sampling with non-distortionary SYNTHID-TEXT. The addition of the watermark does not affect speculative sampling’s efficiency (reflected in the acceptance rate). However, the addition of speculative sampling does reduce the detectability of the watermark (measured using true positive rate for fixed false positive rate of 1%). Results are provided with 90% confidence intervals.

$$= P(g_{t,\ell}^D | k_t = k^D) f_g(g_{t,\ell}^T) P(k_t = k^D) + P(g_{t,\ell}^T | k_t = k^T) f_g(g_{t,\ell}^D) [1 - P(k_t = k^D)].$$

822 Note that the prior probability  $P(k_t = k^D)$  is equal to the fraction of tokens that come  
823 from the draft. This can be learned as a latent parameter of the Bayesian scorer, or set  
824 based on the empirical acceptance rate of the LLMs. We then factorize  $P(g_{t,\ell}^\gamma | w, k_t =$   
825  $k^\gamma)$  similarly to Theorem 6.

### 826 I.5.3 Experimental results

827 We evaluate our fast watermarked speculative sampling algorithm with non-  
828 distortionary SYNTHID-TEXT, using Gemma 7B-IT as the target model and Gemma  
829 2B-IT as the smaller draft model which proposes three ‘lookahead’ tokens at a time.

830 Table I5 demonstrates the two key features of fast watermarked speculative sam-  
831 pling. First, that it **preserves acceptance rate**: we see that the speculative sampling  
832 acceptance rate (and thus overall latency) is very similar with and without watermark-  
833 ing. While we ran our experiment with non-distortionary SYNTHID-TEXT, we expect  
834 this result would hold for any non-distortionary generative watermark (Theorem 42).  
835 Second, that it **does not preserve detectability**: the watermark detectability is less  
836 with fast watermarked speculative sampling, than if we apply the same watermark to  
837 Gemma 7B-IT without speculative sampling.

838 Lastly, Table I5 also shows that of the adapted scoring functions for fast water-  
839 marked speculative sampling presented in Supplementary Appendix I.5.2, the Bayesian  
840 scoring function performs substantially better than WeightedMean.



841 **Appendix J Lemmas**

**Lemma 43** . For any integer  $j \geq 1$ , and real numbers  $a$  and  $b$ :

$$\sum_{i=1}^j \binom{j}{i} \frac{i}{j} a^i b^{j-i} = a(a+b)^{j-1}.$$

*Proof.* First note that:

$$\binom{j}{i} \frac{i}{j} = \frac{j!}{i!(j-i)!} \frac{i}{j} = \frac{(j-1)!}{(i-1)!(j-i)!} = \binom{j-1}{i-1}.$$

Then using the binomial formula for the last equality:

$$\sum_{i=1}^j \binom{j}{i} \frac{i}{j} a^i b^{j-i} = a \sum_{i=1}^j \binom{j-1}{i-1} a^{i-1} b^{j-i} = a \sum_{i=0}^{j-1} \binom{j-1}{i} a^i b^{j-1-i} = a(a+b)^{j-1}.$$

842

□

**Lemma 44** (Upper bound for sum of cubed probabilities). For any probability distribution  $(p_i)_{i=1}^N$ :

$$\sum_{i=1}^N p_i^3 \leq \frac{1}{2} \left( \sum_{i=1}^N p_i^2 \right) \left( 1 + \sum_{i=1}^N p_i^2 \right)$$

843 with equality iff  $(p_i)_{i=1}^N$  is one-hot.

*Proof.* Note that for all  $1 \leq i \leq N$ :

$$1 + \sum_{j=1}^N p_j^2 \geq 1 + p_i^2 = (1 - p_i)^2 + 2p_i \geq 2p_i,$$

with equality iff  $p_i = 1$ . Therefore

$$\sum_{i=1}^N p_i^3 \leq \sum_{i=1}^N p_i^2 \frac{1}{2} \left( 1 + \sum_{j=1}^N p_j^2 \right) = \frac{1}{2} \left( \sum_{i=1}^N p_i^2 \right) \left( 1 + \sum_{i=1}^N p_i^2 \right)$$

844 with equality iff  $p_i = 0$  or  $p_i = 1$  for all  $i$ .

□

**Lemma 45** (Lower bound for sum of cubed probabilities). For any probability distribution  $(p_i)_{i=1}^N$ :

$$\sum_{i=1}^N p_i^3 \geq \frac{3}{2} \sum_{i=1}^n p_i^2 - \frac{1}{2}.$$

*Proof.* By induction on  $N$ . For the base case  $N = 1$ , LHS = 1 and RHS =  $\frac{3}{2} - \frac{1}{2} = 1$ . Now suppose the statement is true for  $N - 1$ . Then

$$\begin{aligned}
\sum_{i=1}^N p_i^3 &= (1 - p_N)^3 \sum_{i=1}^{N-1} \left( \frac{p_i}{1 - p_N} \right)^3 + p_N^3 \\
&\geq (1 - p_N)^3 \left[ \frac{3}{2} \sum_{i=1}^{N-1} \left( \frac{p_i}{1 - p_N} \right)^2 - \frac{1}{2} \right] + p_N^3 && \text{(induction assumption)} \\
&= \frac{3}{2} (1 - p_N) \sum_{i=1}^{N-1} p_i^2 - \frac{1}{2} (1 - p_N)^3 + p_N^3 && \text{(rearrange)} \\
&= \frac{3}{2} \sum_{i=1}^{N-1} p_i^2 - \frac{3}{2} p_N \sum_{i=1}^{N-1} p_i^2 - \frac{1}{2} + \frac{3}{2} p_N - \frac{3}{2} p_N^2 + \frac{3}{2} p_N^3 && \text{(rearrange)} \\
&= \frac{3}{2} \sum_{i=1}^N p_i^2 - \frac{1}{2} - \frac{3}{2} p_N \sum_{i=1}^N p_i^2 + \frac{3}{2} p_N - 3p_N^2 + 3p_N^3. && \text{(rearrange)}
\end{aligned}$$

Note that  $\sum_{i=1}^N p_i^2 \leq p_N^2 + (1 - p_N)^2 = 1 - 2p_N + 2p_N^2$ , so:

$$\begin{aligned}
\sum_{i=1}^N p_i^3 &\geq \frac{3}{2} \sum_{i=1}^N p_i^2 - \frac{1}{2} - \frac{3}{2} p_N (1 - 2p_N + 2p_N^2) + \frac{3}{2} p_N - 3p_N^2 + 3p_N^3 \\
&= \frac{3}{2} \sum_{i=1}^N p_i^2 - \frac{1}{2}.
\end{aligned}$$

845

□

## 846 Appendix K Proofs

### 847 K.1 Proof of Theorem 6

*Proof.* For the unwatermarked case  $P(g|\neg w)$ , the  $g$ -values  $\{g_{t,\ell}\}_{1 \leq t \leq T, 1 \leq \ell \leq m}$  are independent across timesteps  $t$  and across layers  $\ell$ . Furthermore, each  $g_{t,\ell}$  follows the (unwatermarked)  $g$ -value distribution with p.d.f/p.m.f.  $f_g$ , thus:

$$\begin{aligned}
P(g|\neg w) &= \prod_{t=1}^T \prod_{\ell=1}^m P(g_{t,\ell}|\neg w) \\
&= \prod_{t=1}^T \prod_{\ell=1}^m f_g(g_{t,\ell}).
\end{aligned}$$

For the watermarked case  $P(g|w)$ , we assume the  $g$ -values are independent across timesteps  $t$  but not across layers  $\ell$ :

$$P(g|w) = \prod_{t=1}^T \prod_{\ell=1}^m P(g_{t,\ell}|w, g_{t,<\ell}).$$

To compute  $P(g_{t,\ell}|w, g_{t,<\ell})$ , we introduce and marginalize over a latent variable  $\psi_{t,\ell} \in \{1, \dots, N\}$  which represents the number of unique candidate tokens in a tournament ‘match’ at layer  $\ell$ , on timestep  $t$ :

$$P(g_{t,\ell}|w, g_{t,<\ell}) = \sum_{c=1}^N P(g_{t,\ell}|\psi_{t,\ell} = c)P(\psi_{t,\ell} = c|g_{t,<\ell}).$$

Next, the distribution  $P(g_{t,\ell}|\psi_{t,\ell} = c)$  is equal to the distribution of the maximum of  $c$  i.i.d. samples from  $f_g$ , which can be shown to equal:

$$P(g_{t,\ell}|\psi_{t,\ell} = c) = \begin{cases} cF_g(g_{t,\ell})^{c-1}f_g(g_{t,\ell}) & \text{if } f_g \text{ is continuous} \\ F_g(g_{t,\ell})^c - [F_g(g_{t,\ell}) - f_g(g_{t,\ell})]^c & \text{if } f_g \text{ is discrete.} \end{cases}$$

848

□

## 849 K.2 Proof of Theorem 11

*Proof.* In this proof we refer to Methods Algorithm 1 for single layer Tournament sampling. First note that if  $p(x_t) = 0$  then  $\mathbb{P}(\text{Alg 1 returns } x_t) = 0$ ; the rest of this proof assumes  $p(x_t) \neq 0$ .

$$\begin{aligned} & \mathbb{P}(\text{Alg 1 returns } x_t) \\ &= \sum_{j=1}^N \sum_{i=1}^j \mathbb{P}(|Y^*| = j, x_t \text{ appears } i \text{ times in } Y^*, \text{ Alg 1 returns } x_t) \\ &= \sum_{j=1}^N \sum_{i=1}^j \binom{N}{j} p(V^{<g_1(x_t,r)})^{N-j} \binom{j}{i} p(x_t)^i p(V^{=g_1(x_t,r)} \setminus x_t)^{j-i} \frac{i}{j} \\ &= \sum_{j=1}^N \binom{N}{j} p(V^{<g_1(x_t,r)})^{N-j} \sum_{i=1}^j \binom{j}{i} \frac{i}{j} p(x_t)^i p(V^{=g_1(x_t,r)} \setminus x_t)^{j-i}. \quad (\text{rearrange}) \end{aligned}$$

Now note that, by application of Lemma 43:

$$\begin{aligned} \sum_{i=1}^j \binom{j}{i} \frac{i}{j} p(x_t)^i p(V^{=g_1(x_t,r)} \setminus x_t)^{j-i} &= p(x_t) \left[ p(x_t) + p(V^{=g_1(x_t,r)} \setminus x_t) \right]^{j-1} \quad (\text{Lemma 43}) \\ &= p(x_t) p(V^{=g_1(x_t,r)})^{j-1}. \quad (\text{simplify}) \end{aligned}$$

Substituting this back in:

$$\begin{aligned}
& \mathbb{P}(\text{Alg 1 returns } x_t) \\
&= \sum_{j=1}^N \binom{N}{j} p(V^{<g_1(x_t,r)})^{N-j} p(x_t) p(V^{=g_1(x_t,r)})^{j-1} \\
&= \frac{p(x_t)}{p(V^{=g_1(x_t,r)})} \sum_{j=1}^N \binom{N}{j} p(V^{<g_1(x_t,r)})^{N-j} p(V^{=g_1(x_t,r)})^j && \text{(rearrange)} \\
&= \frac{p(x_t)}{p(V^{=g_1(x_t,r)})} \left( \left[ p(V^{<g_1(x_t,r)}) + p(V^{=g_1(x_t,r)}) \right]^N - p(V^{<g_1(x_t,r)})^N \right) && \text{(binomial formula)} \\
&= \frac{p(x_t)}{p(V^{=g_1(x_t,r)})} \left( p(V^{\leq g_1(x_t,r)})^N - p(V^{<g_1(x_t,r)})^N \right). && \text{(simplify)}
\end{aligned}$$

850

□

### 851 **K.3 Proof of computational complexities**

#### 852 *Tournament sampling*

853 The tournament-based implementation of multi-layer Tournament sampling presented  
854 in Methods Algorithm 2 requires  $N^m$  samples to be taken from  $p_{\text{LM}}(\cdot|x_{<t})$  and  $N^m - 1$   
855 comparison operations to decide the winners of the matches. The number of  $g$ -values  
856 to be computed is at most  $N^m + N^{m-1} + \dots + N = N^{m+1} - N$  (if you compute the  
857  $g$ -values for all candidates in the tournament) or  $m|V|$  (if you compute  $g$ -values for  
858 all tokens in the vocabulary for every layer).

#### 859 *Vectorised tournament, general*

860 The general vectorised implementation of Tournament sampling presented in  
861 Theorem 15 requires  $m$  applications of Equation (E21). Equation (E21) requires the  
862 computation of  $p(V^{<g(x_t)})$  and  $p(V^{=g(x_t)})$  for each  $x_t \in V$ ; this can be computed in  
863  $O(|V| \log |V|)$  operations by first sorting the  $g$ -values. The number of  $g$ -values to be  
864 computed is  $m|V|$ , and only one sample needs to be taken at the end of the process.

#### 865 *Vectorised tournament, binary $g$ -values*

866 In the special case of binary  $g$ -values (which we use in most of our experiments, with a  
867 Bernoulli  $g$ -value distribution), each layer only requires the computation of  $p(V^{g_1=0})$   
868 and  $p(V^{g_1=1})$  (see Corollary 14), thus no sort is required and the number of operations  
869 is  $O(|V|)$  per layer.

#### 870 *Gumbel sampling*

871 Gumbel sampling (Supplementary Appendix B.1.1) requires us to compute  $|V|$   $g$ -  
872 values – i.e.,  $U_i$  in Equation (B12). We then need to compute  $-\frac{p(x_i)}{\log(U_i)}$  for every  $x_i \in V$   
873 then take the argmin, which requires  $O(|V|)$  operations.

874 **Soft Red List sampling**

875 Soft Red List sampling (Supplementary Appendix B.1.2) requires us to compute  $|V|$   
 876 (binary)  $g$ -values. Adding a constant to all logits on the green list and taking softmax  
 877 requires  $O(|V|)$  operations, then finally we take a single sample from  $p_{\text{wm}}$ .

878 **K.4 Proof of Theorem 17**

*Proof.* Equation (E16) gives an expression for  $p_{\text{wm}}(x_t|p, r, f_g, 2, 1)$  which we can rewrite:

$$\begin{aligned} p_{\text{wm}}(x_t|p, r, f_g, 2, 1) &= p(x_t) \left( p(V^{=g_1(x_t, r)}) + 2p(V^{<g_1(x_t, r)}) \right) && \text{(Eqn E16)} \\ &= p(x_t) \left( \sum_{x \in V} p(x) [\mathbb{1}_{g_1(x, r)=g_1(x_t, r)} + 2\mathbb{1}_{g_1(x, r)<g_1(x_t, r)}] \right) && \text{(rearrange)} \end{aligned}$$

Next observe that for any  $x, x_t \in V$  (here for conciseness we write  $\mathbb{E}_r$  to mean  $\mathbb{E}_{r \sim \text{Unif}(\mathcal{R})}$ ):

$$\begin{aligned} &\mathbb{E}_r [\mathbb{1}_{g_1(x, r)=g_1(x_t, r)}] + 2\mathbb{E}_r [\mathbb{1}_{g_1(x, r)<g_1(x_t, r)}] \\ &= \mathbb{E}_r [\mathbb{1}_{g_1(x, r)=g_1(x_t, r)}] + \mathbb{E}_r [\mathbb{1}_{g_1(x, r)<g_1(x_t, r)}] + \mathbb{E}_r [\mathbb{1}_{g_1(x, r)>g_1(x_t, r)}] \quad \text{(by Methods Def 4)} \\ &= \mathbb{E}_r [\mathbb{1}_{g_1(x, r)=g_1(x_t, r)} + \mathbb{1}_{g_1(x, r)<g_1(x_t, r)} + \mathbb{1}_{g_1(x, r)>g_1(x_t, r)}] \\ &= \mathbb{E}_r [1] \\ &= 1. \end{aligned}$$

Substituting back:

$$\begin{aligned} \mathbb{E}_r [p_{\text{wm}}(x_t|p, r, f_g, 2, 1)] &= p(x_t) \left( \sum_{x \in V} p(x) \right) \\ &= p(x_t). \end{aligned}$$

879

□

880 **K.5 Proof of Theorem 18**

*Proof.* Proof by induction. The  $m = 1$  base case is given by Theorem 17. For the induction case, suppose Equation (G23) is true for  $m - 1$ . From Theorem 15, we know  $p_{\text{wm}}(\cdot|p, r_t, f_g, 2, m) = W(p_{\text{wm}}^{(m-1)}, g_m(\cdot, r_t), 2)$  where  $p_{\text{wm}}^{(m-1)} = p_{\text{wm}}(\cdot|p, r_t, f_g, 2, m - 1)$  is the watermarked distribution for  $m - 1$  layers. So:

$$\begin{aligned} &\mathbb{E}_{r_t \sim \text{Unif}(\mathcal{R})} [p_{\text{wm}}(x_t|p, r_t, f_g, 2, m)] \\ &= \mathbb{E}_{r_t \sim \text{Unif}(\mathcal{R})} [W(p_{\text{wm}}(\cdot|p, r_t, f_g, 2, m - 1), g_m(\cdot, r_t), 2)]. \end{aligned}$$

Now consider that  $p_{\text{wm}}(\cdot|p, r_t, f_g, 2, m-1)$  depends on  $r_t$  only via the  $g_\ell(\cdot, r_t)$  values for  $\ell = 1, \dots, m-1$ . Because of our definition of  $g$ -values using a pseudorandom hash function (Methods Definition 4), we can separate the expectation for different layers:

$$\begin{aligned}
&= \mathbb{E}_{r_t \sim \text{Unif}(\mathcal{R})} \left[ \mathbb{E}_{r'_t \sim \text{Unif}(\mathcal{R})} [W(p_{\text{wm}}(\cdot|p, r_t, f_g, 2, m-1), g_m(\cdot, r'_t), 2)] \right] \\
&= \mathbb{E}_{r_t \sim \text{Unif}(\mathcal{R})} [p_{\text{wm}}(\cdot|p, r_t, f_g, 2, m-1)] && \text{(Thm 17)} \\
&= p(x_t). && \text{(induction assumption)}
\end{aligned}$$

881

□

## 882 K.6 Proof of Theorem 19

*Proof.* Consider the family of probability distributions over a two-word vocabulary  $V = \{a, b\}$  with  $p_{\text{LM}}(a) = p$  and  $p_{\text{LM}}(b) = 1-p$  for some  $p \in [0, 1]$ . Then by considering the cases where  $a$  appears  $i$  times in the  $N$  samples, we can write:

$$\begin{aligned}
&\mathbb{E}_r [p_{\text{wm}}(a|p_{\text{LM}}, r, f_g, N, 1)] \\
&= \mathbb{E}_r \left[ p^N + \sum_{i=1}^{N-1} \binom{N}{i} p^i (1-p)^{N-i} \left[ \mathbb{1}_{g_1(a,r) > g_1(b,r)} + \mathbb{1}_{g_1(a,r) = g_1(b,r)} \frac{i}{N} \right] \right] \\
&= p^N + \sum_{i=1}^{N-1} \binom{N}{i} p^i (1-p)^{N-i} \left[ \frac{1 - C_{f_g}}{2} + C_{f_g} \frac{i}{N} \right], && \text{(K35)}
\end{aligned}$$

where  $C_{f_g}$  is the collision probability of  $f_g$ . Expression K35 is a polynomial in  $p$  of degree  $\leq N$ . If the sampling algorithm is non-distortionary, then this polynomial equals  $p_{\text{LM}}(a) = p$  for all  $p \in [0, 1]$ , so the polynomial coefficients must be zero for all powers other than  $p^1$ . However, consider the coefficient of  $p^2$ :

$$\begin{aligned}
&\sum_{i=1}^2 \binom{N}{i} \binom{N-1}{2-i} (-1)^{2-i} \left[ \frac{1 - C_{f_g}}{2} + C_{f_g} \frac{i}{N} \right] \\
&= -N(N-1) \left[ \frac{1 - C_{f_g}}{2} + C_{f_g} \frac{1}{N} \right] + \frac{N(N-1)}{2} \left[ \frac{1 - C_{f_g}}{2} + C_{f_g} \frac{2}{N} \right] \\
&= \frac{N(N-1)}{4} [C_{f_g} - 1].
\end{aligned}$$

883

This is non-zero as  $N > 2$  and  $C_{f_g} \neq 1$ . Proof by contradiction.

□

## 884 K.7 Proof of Theorem 21

885

*Proof.* In Methods Algorithm 3, each response  $\mathbf{y}^i$  is in fact a continuation of its corresponding prompt  $\mathbf{x}^i$ . Therefore we write  $\mathbf{y}_i = \mathbf{x}_{n_i+1}^i, \dots, \mathbf{x}_{T_i}^i$  where  $n_i$  is the length of prompt  $\mathbf{x}^i = \mathbf{x}_1^i, \dots, \mathbf{x}_{n_i}^i$ .

886

Now, each  $\mathbb{P}_{\text{wm}}(\mathbf{y}^i | \mathbf{x}^i, k; (\mathbf{x}^1, \mathbf{y}^1), \dots, (\mathbf{x}^{i-1}, \mathbf{y}^{i-1}))$  can be written as a product  $\prod_{t=n_i+1}^{T_i} \mathbb{P}_{\text{wm}}(\mathbf{x}_t^i | \mathbf{x}_{<t}^i, k; (\mathbf{x}^1, \mathbf{y}^1), \dots, (\mathbf{x}^{i-1}, \mathbf{y}^{i-1}))$ . Let  $W_i$  denote the set of all

887

timesteps  $t = n_i + 1, \dots, T_i$  for which the context window  $\mathbf{x}_{t-H:t-1}^i := (\mathbf{x}_{t-H}^i, \dots, \mathbf{x}_{t-1}^i)$  is already in the context history  $C_1 \cup C_2 \cup \dots \cup C_i$  (see line 6 in Methods Algorithm 3). Thus:

$$\begin{aligned} & \mathbb{P}_{\text{wm}}(\mathbf{x}_t^i | \mathbf{x}_{<t}^i, k; (\mathbf{x}^1, \mathbf{y}^1), \dots, (\mathbf{x}^{i-1}, \mathbf{y}^{i-1})) \\ &= \begin{cases} p_{\text{LM}}(\mathbf{x}_t^i | \mathbf{x}_{<t}^i) & \text{if } t \in W_i \\ \mathbb{P}[\mathcal{S}(p_{\text{LM}}(\cdot | \mathbf{x}_{<t}^i), h(\mathbf{x}_{t-H:t-1}^i, k)) = \mathbf{x}_t^i] & \text{otherwise.} \end{cases} \end{aligned}$$

Thus:

$$\begin{aligned} & \mathbb{E}_{k \sim \text{Unif}(\mathcal{R})} \left[ \prod_{i=1}^K \mathbb{P}_{\text{wm}}(\mathbf{y}^i | \mathbf{x}^i, k; (\mathbf{x}^1, \mathbf{y}^1), \dots, (\mathbf{x}^{i-1}, \mathbf{y}^{i-1})) \right] \\ &= \mathbb{E}_{k \sim \text{Unif}(\mathcal{R})} \left[ \prod_{i=1}^K \prod_{t=n_i+1}^{T_i} \mathbb{P}_{\text{wm}}(\mathbf{x}_t^i | \mathbf{x}_{<t}^i, k; (\mathbf{x}^1, \mathbf{y}^1), \dots, (\mathbf{x}^{i-1}, \mathbf{y}^{i-1})) \right] \\ &= \mathbb{E}_{k \sim \text{Unif}(\mathcal{R})} \left[ \prod_{i=1}^K \prod_{t \in W_i} p_{\text{LM}}(\mathbf{x}_t^i | \mathbf{x}_{<t}^i) \prod_{t \notin W_i} \mathbb{P}[\mathcal{S}(p_{\text{LM}}(\cdot | \mathbf{x}_{<t}^i), h(\mathbf{x}_{t-H:t-1}^i, k)) = \mathbf{x}_t^i] \right] \end{aligned}$$

Note that this product depends on  $k$  only through  $h(\mathbf{x}_{t-H:t-1}^i, k)$ , where all  $\mathbf{x}_{t-H:t-1}^i$  terms are different. By pseudorandom definition of  $h$  (Methods Section 5.3), taking expectation  $\mathbb{E}_{k \sim \text{Unif}(\mathcal{R})}$  over the whole product is equivalent to taking separate expectations over the random seed produced by  $h$ :

$$\begin{aligned} &= \prod_{i=1}^K \prod_{t \in W_i} p_{\text{LM}}(\mathbf{x}_t^i | \mathbf{x}_{<t}^i) \prod_{t \notin W_i} \mathbb{E}_{r \sim \text{Unif}(\mathcal{R})} (\mathbb{P}[\mathcal{S}(p_{\text{LM}}(\cdot | \mathbf{x}_{<t}^i), r) = \mathbf{x}_t^i]) \\ &= \prod_{i=1}^K \prod_{t \in W_i} p_{\text{LM}}(\mathbf{x}_t^i | \mathbf{x}_{<t}^i) \prod_{t \notin W_i} p_{\text{LM}}(\mathbf{x}_t^i | \mathbf{x}_{<t}^i) \quad (\mathcal{S} \text{ non-distortionary}) \\ &= \prod_{i=1}^K \prod_{t=n_i+1}^{T_i} p_{\text{LM}}(\mathbf{x}_t^i | \mathbf{x}_{<t}^i) \\ &= \prod_{i=1}^K p_{\text{LM}}(\mathbf{y}^i | \mathbf{x}^i). \end{aligned}$$

888

□

## 889 K.8 Proof of Theorem 25

*Proof.* We can divide  $F_{gw}(z)$  by how many unique samples there are in the  $N$  samples drawn from  $p_{\text{LM}}$  in Methods Algorithm 1:

$$F_{gw}(z) = \mathbb{P}_{r \sim \text{Unif}(\mathcal{R}), x \sim p_{\text{wm}}(\cdot | p, r, f_g, N, 1)} [g_1(x, r) \leq z] \quad (\text{Definition 24})$$

$$\begin{aligned}
&= \sum_{j=1}^N C_{p_{LM}}^{N,j} \mathbb{P}_{r \sim \text{Unif}(\mathcal{R})} [j \text{ unique } y_1, \dots, y_j \text{ all have } g_1(y_i, r) \leq z] \\
&= \sum_{j=1}^N C_{p_{LM}}^{N,j} F_g(z)^j. \tag{Methods Definition 3}
\end{aligned}$$

Next, if  $f_g$  is continuous, then:

$$\begin{aligned}
f_{gw}(z) &= \frac{d}{dz} F_{gw}(z) \\
&= f_g(z) \sum_{j=1}^N C_{p_{LM}}^{N,j} j F_g(z)^{j-1}. \tag{chain rule}
\end{aligned}$$

Lastly, if  $f_g$  is discrete with support  $z_1 < z_2 < \dots < z_L$ , then for each  $z_i$ :

$$\begin{aligned}
f_{gw}(z_i) &= F_{gw}(z_i) - F_{gw}(z_{i-1}) \tag{let } F_{gw}(z_0) = 0. \\
&= \sum_{j=1}^N C_{p_{LM}}^{N,j} F_g(z_i)^j - \sum_{j=1}^N C_{p_{LM}}^{N,j} F_g(z_{i-1})^j \tag{shown above} \\
&= \sum_{j=1}^N C_{p_{LM}}^{N,j} \left( F_g(z_i)^j - [F_g(z_i) - f_g(z_i)]^j \right) \tag{rearrange} \\
&= \sum_{j=1}^N C_{p_{LM}}^{N,j} \left( \sum_{k=1}^j (-1)^{k-1} \binom{j}{k} F_g(z_i)^{j-k} f_g(z_i)^k \right) \tag{binomial formula} \\
&= f_g(z_i) \sum_{j=1}^N C_{p_{LM}}^{N,j} \left( \sum_{k=1}^j (-1)^{k-1} \binom{j}{k} F_g(z_i)^{j-k} f_g(z_i)^{k-1} \right).
\end{aligned}$$

890

□

## 891 **K.9 Proof of Theorem 29**

*Proof.* From Equation (H24),

$$F_{gw}^{N+1}(z) = \sum_{j=1}^{N+1} C_{p_{LM}}^{N+1,j} F_g(z)^j.$$

Note that  $C_{p_{LM}}^{N+1,j}$  can be written as:

$$C_{p_{LM}}^{N+1,j} = C_{p_{LM}}^{N,j} \mathbb{P}_{p_{LM}}^{N,j} \text{ (same)} + C_{p_{LM}}^{N,j-1} \mathbb{P}_{p_{LM}}^{N,j-1} \text{ (new)}$$

892 where  $\mathbb{P}_{p_{LM}}^{N,j}$  (same) is the probability that an additional sample from  $p_{LM}$  is already in  
893 a collection  $Y$  of  $N$  samples sampled i.i.d. from  $p_{LM}$ , given that  $Y$  contains  $j$  unique



894 elements. Similarly  $\mathbb{P}_{p_{\text{LM}}}^{N,j-1}(\text{new})$  is the probability that an additional sample from  
 895  $p_{\text{LM}}$  is not already in the collection  $Y$  of  $N$  samples sampled from  $p_{\text{LM}}$ , given that  $Y$   
 896 contains  $j - 1$  unique elements.

Now, we can substitute this in:

$$\begin{aligned}
 F_{gw}^{N+1}(z) &= \sum_{j=1}^{N+1} [C_{p_{\text{LM}}}^{N,j} \mathbb{P}_{p_{\text{LM}}}^{N,j}(\text{same}) + C_{p_{\text{LM}}}^{N,j-1} \mathbb{P}_{p_{\text{LM}}}^{N,j-1}(\text{new})] F_g(z)^j \\
 &= \sum_{j=1}^N C_{p_{\text{LM}}}^{N,j} [\mathbb{P}_{p_{\text{LM}}}^{N,j}(\text{same}) F_g(z)^j + \mathbb{P}_{p_{\text{LM}}}^{N,j}(\text{new}) F_g(z)^{j+1}] \quad (\text{reindex}) \\
 &= \sum_{j=1}^N C_{p_{\text{LM}}}^{N,j} [\mathbb{P}_{p_{\text{LM}}}^{N,j}(\text{same}) + \mathbb{P}_{p_{\text{LM}}}^{N,j}(\text{new}) F_g(z)] F_g(z)^j \quad (\text{rearrange}) \\
 &= \sum_{j=1}^N C_{p_{\text{LM}}}^{N,j} [1 - (1 - F_g(z)) \mathbb{P}_{p_{\text{LM}}}^{N,j}(\text{new})] F_g(z)^j \quad (\mathbb{P}(\text{new}) + \mathbb{P}(\text{same}) = 1) \\
 &= F_{gw}^N(z) - (1 - F_g(z)) \sum_{j=1}^N \mathbb{P}_{p_{\text{LM}}}^{N,j}(\text{new}) C_{p_{\text{LM}}}^{N,j} F_g(z)^j \quad (\text{Eqn H24}) \\
 &\geq F_{gw}^N(z).
 \end{aligned}$$

897 When  $0 < F_{gw}^N(z) < 1$ , the equality holds iff  $\mathbb{P}_{p_{\text{LM}}}^{N,j}(\text{new}) C_{p_{\text{LM}}}^{N,j} = 0$  for all  $j = 1, \dots, N$ ;  
 898 equivalently iff the support of  $p_{\text{LM}}(\cdot | x_{<t})$  has  $j$  or fewer elements for all  $j = 1, \dots, N$ .  
 899 This is true iff  $p_{\text{LM}}(\cdot | x_{<t})$  is one-hot.  $\square$

## 900 K.10 Proof of Theorem 31

*Proof.* For conciseness, we will write  $g(x)$  to mean  $g_1(x, r)$ . From Equation (E16):

$$\begin{aligned}
 p_{\text{wm}}(x | p_{\text{LM}}, r, f_g, 2, 1) &= p_{\text{LM}}(x) [p_{\text{LM}}(V=g(x)) + 2p_{\text{LM}}(V<g(x))] \\
 &= p_{\text{LM}}(x) \left[ p_{\text{LM}}(x) + \sum_{x' \in V, x' \neq x} p_{\text{LM}}(x') (\mathbb{1}_{g(x')=g(x)} + 2\mathbb{1}_{g(x')<g(x)}) \right].
 \end{aligned}$$

So the collision probability  $C_{p_{\text{wm}}}^{2,1} = \sum_{x \in V} p_{\text{wm}}(x | p_{\text{LM}}, r, f_g, 2, 1)^2$  equals:

$$C_{p_{\text{wm}}}^{2,1} = \sum_{x \in V} p_{\text{LM}}(x)^2 \left[ p_{\text{LM}}(x) + \sum_{x' \in V, x' \neq x} p_{\text{LM}}(x') (\mathbb{1}_{g(x')=g(x)} + 2\mathbb{1}_{g(x')<g(x)}) \right]^2.$$

Expanding this out, it can be written as  $C_{p_{\text{wm}}}^{2,1} = A + B + C + D$  where:

$$A = \sum_{x \in V} p_{\text{LM}}(x)^4$$

$$\begin{aligned}
B &= 2 \sum_{x \in V} p_{\text{LM}}(x)^3 \sum_{x' \in V, x' \neq x} p_{\text{LM}}(x') (\mathbb{1}_{g(x')=g(x)} + 2\mathbb{1}_{g(x') < g(x)}) \\
C &= \sum_{x \in V} p_{\text{LM}}(x)^2 \sum_{x' \in V, x' \neq x} p_{\text{LM}}(x')^2 (\mathbb{1}_{g(x')=g(x)} + 2\mathbb{1}_{g(x') < g(x)})^2 \\
D &= \sum_{x \in V} p_{\text{LM}}(x)^2 \sum_{\substack{x_1, x_2 \in V, \\ x_1 \neq x, x_2 \neq x, x_1 \neq x_2}} p_{\text{LM}}(x_1) p_{\text{LM}}(x_2) (\mathbb{1}_{g(x_1)=g(x)} + 2\mathbb{1}_{g(x_1) < g(x)}) (\mathbb{1}_{g(x_2)=g(x)} + 2\mathbb{1}_{g(x_2) < g(x)})
\end{aligned}$$

Tackling these individually, first we have  $A = C_{p_{\text{LM}}}^{4,1}$ . Now  $B$ : for  $x' \neq x$ :

$$\mathbb{E}_r [\mathbb{1}_{g(x')=g(x)} + 2\mathbb{1}_{g(x') < g(x)}] = \mathbb{E}_r [\mathbb{1}_{g(x')=g(x)} + \mathbb{1}_{g(x') < g(x)} + \mathbb{1}_{g(x') > g(x)}] = 1$$

so:

$$\mathbb{E}_r[B] = 2 \sum_{x \in V} p_{\text{LM}}(x)^3 \sum_{x' \in V, x' \neq x} p_{\text{LM}}(x') = 2 \sum_{x \in V} p_{\text{LM}}(x)^3 (1 - p_{\text{LM}}(x)) = 2C_{p_{\text{LM}}}^{3,1} - 2C_{p_{\text{LM}}}^{4,1}.$$

Next  $C$ :

$$\begin{aligned}
\mathbb{E}_r [(\mathbb{1}_{g(x')=g(x)} + 2\mathbb{1}_{g(x') < g(x)})^2] &= \mathbb{E}_r [\mathbb{1}_{g(x')=g(x)} + 4\mathbb{1}_{g(x') < g(x)}] \\
&= C_{f_g}^{2,1} + 4 \frac{1 - C_{f_g}^{2,1}}{2} \\
&= 2 - C_{f_g}^{2,1}.
\end{aligned}$$

and so:

$$\begin{aligned}
\mathbb{E}_r[C] &= \sum_{x \in V} p_{\text{LM}}(x)^2 \sum_{x' \in V, x' \neq x} p_{\text{LM}}(x')^2 (2 - C_{f_g}^{2,1}) \\
&= (2 - C_{f_g}^{2,1}) \sum_{x \in V} p_{\text{LM}}(x)^2 (C_{p_{\text{LM}}}^{2,1} - p_{\text{LM}}(x)^2) \\
&= (2 - C_{f_g}^{2,1}) (C_{p_{\text{LM}}}^{2,1})^2 - (2 - C_{f_g}^{2,1}) C_{p_{\text{LM}}}^{4,1}.
\end{aligned}$$

Lastly for  $D$ , note that for  $x_1 \neq x$ ,  $x_2 \neq x$ ,  $x_1 \neq x_2$ :

$$\begin{aligned}
&\mathbb{E}_r [(\mathbb{1}_{g(x_1)=g(x)} + 2\mathbb{1}_{g(x_1) < g(x)}) (\mathbb{1}_{g(x_2)=g(x)} + 2\mathbb{1}_{g(x_2) < g(x)})] \\
&= \mathbb{E}_r [\mathbb{1}_{g(x_1)=g(x_2)=g(x)} + 2\mathbb{1}_{g(x_1) < g(x_2)=g(x)} + 2\mathbb{1}_{g(x_2) < g(x_1)=g(x)} + 4\mathbb{1}_{g(x_1) < g(x), g(x_2) < g(x)}] \\
&= C_{f_g}^{3,1} + 2 \frac{C_{f_g}^{3,2}}{3 \times 2} + 2 \frac{C_{f_g}^{3,2}}{3 \times 2} + 4 \left( \frac{C_{f_g}^{3,2}}{3 \times 2} + \frac{C_{f_g}^{3,3}}{3} \right) \\
&= C_{f_g}^{3,1} + \frac{4}{3} C_{f_g}^{3,2} + \frac{4}{3} C_{f_g}^{3,3} \\
&= \frac{4}{3} - \frac{1}{3} C_{f_g}^{3,1}
\end{aligned}$$

where the last equality is because because  $C_{f_g}^{3,1} + C_{f_g}^{3,2} + C_{f_g}^{3,3} = 1$ . Also note that:

$$\begin{aligned} \sum_{\substack{x_1, x_2 \in V, \\ x_1 \neq x, x_2 \neq x, x_1 \neq x_2}} p_{\text{LM}}(x_1)p_{\text{LM}}(x_2) &= \sum_{\substack{x_1 \in V: \\ x_1 \neq x}} p_{\text{LM}}(x_1) (1 - p_{\text{LM}}(x) - p_{\text{LM}}(x_1)) \\ &= (1 - p_{\text{LM}}(x))^2 - C_{p_{\text{LM}}}^{2,1} + p_{\text{LM}}(x)^2 \\ &= 1 - C_{p_{\text{LM}}}^{2,1} - 2p_{\text{LM}}(x) + 2p_{\text{LM}}(x)^2. \end{aligned}$$

And so:

$$\begin{aligned} \mathbb{E}_r[D] &= \sum_{x \in V} p_{\text{LM}}(x)^2 (1 - C_{p_{\text{LM}}}^{2,1} - 2p_{\text{LM}}(x) + 2p_{\text{LM}}(x)^2) \left( \frac{4}{3} - \frac{1}{3}C_{f_g}^{3,1} \right) \\ &= \left( \frac{4}{3} - \frac{1}{3}C_{f_g}^{3,1} \right) \left[ (1 - C_{p_{\text{LM}}}^{2,1}) \sum_{x \in V} p_{\text{LM}}(x)^2 - 2 \sum_{x \in V} p_{\text{LM}}(x)^3 + 2 \sum_{x \in V} p_{\text{LM}}(x)^4 \right] \\ &= \left( \frac{4}{3} - \frac{1}{3}C_{f_g}^{3,1} \right) [C_{p_{\text{LM}}}^{2,1} - (C_{p_{\text{LM}}}^{2,1})^2 - 2C_{p_{\text{LM}}}^{3,1} + 2C_{p_{\text{LM}}}^{4,1}]. \end{aligned}$$

Summing all four together and rearranging:

$$\begin{aligned} \mathbb{E}_{r \sim \text{Unif}(\mathcal{R})} [C_{p_{\text{wm}}}^{2,1}] &= C_{p_{\text{LM}}}^{4,1} + 2C_{p_{\text{LM}}}^{3,1} - 2C_{p_{\text{LM}}}^{4,1} + (2 - C_{f_g}^{2,1}) (C_{p_{\text{LM}}}^{2,1})^2 - (2 - C_{f_g}^{2,1}) C_{p_{\text{LM}}}^{4,1} \\ &\quad + \left( \frac{4}{3} - \frac{1}{3}C_{f_g}^{3,1} \right) [C_{p_{\text{LM}}}^{2,1} - (C_{p_{\text{LM}}}^{2,1})^2 - 2C_{p_{\text{LM}}}^{3,1} + 2C_{p_{\text{LM}}}^{4,1}] \\ &= \left[ \frac{4}{3} - \frac{1}{3}C_{f_g}^{3,1} \right] C_{p_{\text{LM}}}^{2,1} + \left[ \frac{2}{3} + \frac{1}{3}C_{f_g}^{3,1} - C_{f_g}^{2,1} \right] (C_{p_{\text{LM}}}^{2,1})^2 \\ &\quad - \left[ \frac{2}{3} - \frac{2}{3}C_{f_g}^{3,1} \right] C_{p_{\text{LM}}}^{3,1} - \left[ \frac{1}{3} + \frac{2}{3}C_{f_g}^{3,1} - C_{f_g}^{2,1} \right] C_{p_{\text{LM}}}^{4,1}. \end{aligned}$$

901

□

## 902 K.11 Proof of Theorem 32

*Proof.* From Theorem 31 we have:

$$\begin{aligned} \mathbb{E}_{r \sim \text{Unif}(\mathcal{R})} [C_{p_{\text{wm}}}^{2,1}] &= \left[ \frac{4}{3} - \frac{1}{3}C_{f_g}^{3,1} \right] C_{p_{\text{LM}}}^{2,1} + \left[ \frac{2}{3} + \frac{1}{3}C_{f_g}^{3,1} - C_{f_g}^{2,1} \right] (C_{p_{\text{LM}}}^{2,1})^2 \\ &\quad - \left[ \frac{2}{3} - \frac{2}{3}C_{f_g}^{3,1} \right] C_{p_{\text{LM}}}^{3,1} - \left[ \frac{1}{3} + \frac{2}{3}C_{f_g}^{3,1} - C_{f_g}^{2,1} \right] C_{p_{\text{LM}}}^{4,1}. \end{aligned}$$

Noting that  $\left[\frac{2}{3} - \frac{2}{3}C_{f_g}^{3,1}\right] \geq 0$ , and from Lemma 44, we have  $C_{p_{LM}}^{3,1} \leq \frac{1}{2}C_{p_{LM}}^{2,1}(1 + C_{p_{LM}}^{2,1})$  (with equality iff  $p_{LM}$  is one-hot), and so:

$$\begin{aligned} \mathbb{E}_{r \sim \text{Unif}(\mathcal{R})} [C_{p_{wm}}^{2,1}] &\geq \left[\frac{4}{3} - \frac{1}{3}C_{f_g}^{3,1}\right] C_{p_{LM}}^{2,1} + \left[\frac{2}{3} + \frac{1}{3}C_{f_g}^{3,1} - C_{f_g}^{2,1}\right] (C_{p_{LM}}^{2,1})^2 \\ &\quad - \left[\frac{2}{3} - \frac{2}{3}C_{f_g}^{3,1}\right] \frac{1}{2}C_{p_{LM}}^{2,1}(1 + C_{p_{LM}}^{2,1}) - \left[\frac{1}{3} + \frac{2}{3}C_{f_g}^{3,1} - C_{f_g}^{2,1}\right] C_{p_{LM}}^{4,1} \quad (\text{substitute}) \\ &= C_{p_{LM}}^{2,1} + \left[\frac{1}{3} + \frac{2}{3}C_{f_g}^{3,1} - C_{f_g}^{2,1}\right] \left[(C_{p_{LM}}^{2,1})^2 - C_{p_{LM}}^{4,1}\right]. \quad (\text{rearrange}) \end{aligned}$$

903 Note that  $(C_{p_{LM}}^{2,1})^2 \geq C_{p_{LM}}^{4,1}$ . From Lemma 45 we have  $\frac{2}{3}C_g^{3,1} \geq C_g^{2,1} - \frac{1}{3}$ . It follows  
 904 that  $\mathbb{E}_{r \sim \text{Unif}(\mathcal{R})} [C_{p_{wm}}^{2,1}] \geq C_{p_{LM}}^{2,1}$ .  $\square$

## 905 K.12 Proof of Theorem 39

*Proof.* For Algorithm 5, the acceptance rate is:

$$\begin{aligned} &\sum_{x_{n+1} \in V} p_{wm}(x_{n+1}|x_{1:n}; k) \min\left(1, \frac{q_{wm}(x_{n+1}|x_{1:n}; k)}{p_{wm}(x_{n+1}|x_{1:n}; k)}\right) \\ &= \sum_{x_{n+1} \in V} \min(p_{wm}(x_{n+1}|x_{1:n}; k), q_{wm}(x_{n+1}|x_{1:n}; k)). \end{aligned}$$

Note that  $\min(a, b)$  is concave in  $(a, b)$ . Thus for two random variables  $a, b$ , we have  $\mathbb{E}[\min\{a, b\}] \leq \min(\mathbb{E}[a], \mathbb{E}[b])$  by Jensen's inequality. So taking expectation over  $k$ :

$$\begin{aligned} &\mathbb{E}_{k \sim \text{Unif}(\mathcal{R})} [\text{acceptance rate}] \\ &= \sum_{x_{n+1} \in V} \mathbb{E}_{k \sim \text{Unif}(\mathcal{R})} [\min(p_{wm}(x_{n+1}|x_{1:n}; k), q_{wm}(x_{n+1}|x_{1:n}; k))] \\ &\leq \sum_{x_{n+1} \in V} \min(\mathbb{E}_{k \sim \text{Unif}(\mathcal{R})} [p_{wm}(x_{n+1}|x_{1:n}; k)], \mathbb{E}_{k \sim \text{Unif}(\mathcal{R})} [q_{wm}(x_{n+1}|x_{1:n}; k)]). \end{aligned}$$

Now note that:

$$\begin{aligned} &\mathbb{E}_{k \sim \text{Unif}(\mathcal{R})} [p_{wm}(x_{n+1}|x_{1:n}; k)] \\ &:= \mathbb{E}_{k \sim \text{Unif}(\mathcal{R})} (\mathbb{P}[\mathcal{S}(p(\cdot|x_{1:n}), f_r(x_{1:n}, k)) = x_{n+1}]) \quad (\text{Definition 37}) \\ &= \mathbb{E}_{r \sim \text{Unif}(\mathcal{R})} (\mathbb{P}[\mathcal{S}(p(\cdot|x_{1:n}), r) = x_{n+1}]) \quad (\text{property of } f_r, \text{ see Methods Section 5.3}) \\ &= p(x_{n+1}|x_{1:n}) \quad (\mathcal{S} \text{ non-distortionary}) \end{aligned}$$

and similarly for  $q$ . Thus:

$$\mathbb{E}_{k \sim \text{Unif}(\mathcal{R})} [\text{acceptance rate}] \leq \sum_{x_{n+1} \in V} \min(p(x_{n+1}|x_{1:n}), q(x_{n+1}|x_{1:n}))$$

$$= \sum_{x_{n+1} \in V} p(x_{n+1}|x_{1:n}) \min \left( 1, \frac{q(x_{n+1}|x_{1:n})}{p(x_{n+1}|x_{1:n})} \right).$$

906 This is the acceptance rate for speculative sampling without watermarking (Defini-  
907 tion 35).  $\square$

### 908 K.13 Proof of Theorem 41

*Proof.* There are two cases. **Case 1:** If  $x_{n+1}$  is sampled within the for loop on lines 8 to 15, we can write down the following expression for  $q'(x_{n+1}|x_{1:n}; k^D, k^T)$ :

$$\begin{aligned} q'(x_{n+1}|x_{1:n}; k^D, k^T) &= p_{\text{wm}}(x_{n+1}|x_{1:n}; k^D) \min \left\{ 1, \frac{q(x_{n+1}|x_{1:n})}{p(x_{n+1}|x_{1:n})} \right\} + \\ &\left( 1 - \sum_{x \in V} p_{\text{wm}}(x|x_{1:n}; k^D) \min \left\{ 1, \frac{q(x|x_{1:n})}{p(x|x_{1:n})} \right\} \right) (q-p)_{\text{wm}}^+(x_{n+1}|x_{1:n}; k^T). \end{aligned}$$

909 The first term corresponds to the probability of sampling  $x_{n+1}$  from the draft model  
910 and accepting it. The second term corresponds to the probability of not accepting any  
911 token from the draft model, then sampling  $x_{n+1}$  from the rejection distribution.

Now recall that, from Definition 40:

$$\begin{aligned} p_{\text{wm}}(x_t|x_{<t}; k^D) &:= \mathbb{P} [\mathcal{S}(p(\cdot|x_{<t}), f_r(x_{<t}, k^D)) = x_t] \\ q_{\text{wm}}(x_t|x_{<t}; k^T) &:= \mathbb{P} [\mathcal{S}(q(\cdot|x_{<t}), f_r(x_{<t}, k^T)) = x_t] \\ (q-p)_+^{\text{wm}}(x_t|x_{<t}; k^T) &:= \mathbb{P} [\mathcal{S}([q(\cdot|x_{<t}) - p(\cdot|x_{<t})]_+, f_r(x_{<t}, k^T)) = x_t] \end{aligned}$$

Now, taking expectation over the keys  $k^D \sim \text{Unif}(\mathcal{R})$  and  $k^T \sim \text{Unif}(\mathcal{R})$  is equivalent to taking expectation over the random seed  $r \sim \text{Unif}(\mathcal{R})$  (see Methods Section 5.3); furthermore  $\mathcal{S}$  is non-distortionary (Definition 16), so it follows that:

$$\begin{aligned} \mathbb{E}_{k^D \sim \text{Unif}(\mathcal{R})} [p_{\text{wm}}(x_t|x_{<t}; k^D)] &= p(x_t|x_{<t}) \\ \mathbb{E}_{k^T \sim \text{Unif}(\mathcal{R})} [q_{\text{wm}}(x_t|x_{<t}; k^T)] &= q(x_t|x_{<t}) \\ \mathbb{E}_{k^T \sim \text{Unif}(\mathcal{R})} [(q-p)_+^{\text{wm}}(x_t|x_{<t}; k^T)] &= [q(x_t|x_{<t}) - p(x_t|x_{<t})]_+. \end{aligned}$$

It follows that:

$$\begin{aligned} \mathbb{E}_{k^D \sim \text{Unif}(\mathcal{R}), k^T \sim \text{Unif}(\mathcal{R})} [q'(x_{n+1}|x_{1:n}; k^D, k^T)] &= p(x_{n+1}|x_{1:n}) \min \left\{ 1, \frac{q(x_{n+1}|x_{1:n})}{p(x_{n+1}|x_{1:n})} \right\} + \\ &\left( 1 - \sum_{x \in V} p(x|x_{1:n}) \min \left\{ 1, \frac{q(x|x_{1:n})}{p(x|x_{1:n})} \right\} \right) (q-p)^+(x_{n+1}|x_{1:n}). \end{aligned}$$

912 This expression is equal to the probability distribution of the next token generated by  
913 speculative sampling, and it can be shown (see Theorem 1 proof in [5]) to be equal to  
914 the target distribution  $q(x_{n+1}|x_{1:n})$ .

915 **Case 2:** If  $x_{n+1}$  is sampled from  $q_{\text{wm}}(\cdot|x_{1:n};k^T)$  on line 16, then in expectation  
 916 over  $k^T$  this is also  $q(\cdot|x_{1:n})$ .  $\square$

## 917 K.14 Proof of Theorem 42

*Proof.* For Algorithm 6,

$$\begin{aligned}
 & \mathbb{E}_{k^D \sim \text{Unif}(\mathcal{R}), k^T \sim \text{Unif}(\mathcal{R})} [\text{acceptance rate}] \\
 = & \mathbb{E}_{k^D \sim \text{Unif}(\mathcal{R}), k^T \sim \text{Unif}(\mathcal{R})} \left[ \sum_{x \in V} p_{\text{wm}}(x|x_{1:n};k^D) \min \left( 1, \frac{q(x|x_{1:n})}{p(x|x_{1:n})} \right) \right] \\
 = & \sum_{x \in V} \mathbb{E}_{k^D \sim \text{Unif}(\mathcal{R})} [p_{\text{wm}}(x|x_{1:n};k^D)] \min \left( 1, \frac{q(x|x_{1:n})}{p(x|x_{1:n})} \right) \\
 = & \sum_{x \in V} p(x|x_{1:n}) \min \left( 1, \frac{q(x|x_{1:n})}{p(x|x_{1:n})} \right). \tag{K36}
 \end{aligned}$$

918 The last equality follows from  $\mathcal{S}$  being non-distortionary (Definition 16) and the fact  
 919 that taking expectation over the key is equivalent to taking expectation over the ran-  
 920 dom seed (Methods Section 5.3). The expression in Equation (K36) is the acceptance  
 921 rate for speculative sampling without watermarking (Definition 35).  $\square$

## 922 References

- 923 [37] Giboulot, E., Teddy, F.: Watermax: breaking the LLM watermark detectability-  
 924 robustness-quality trade-off. Preprint at <https://arxiv.org/abs/2403.04808>  
 925 (2024).
- 926 [38] Gumbel, E.J.: Statistical Theory of Extreme Values and Some Practical Applica-  
 927 tions: a Series of Lectures vol. 33. US Government Printing Office, Washington  
 928 (1954).
- 929 [39] Zhao, X., Wang, Y.-X., Li, L.: Protecting language generation models via invisible  
 930 watermarking. In: International Conference on Machine Learning, pp. 42187–  
 931 42199 (2023).
- 932 [40] Hopper, N., Ahn, L., Langford, J.: Provably secure steganography. IEEE Trans-  
 933 actions on Computers **58**(5), 662–676 (2009).
- 934 [41] Zhao, X., Ananth, P.V., Li, L., Wang, Y.-X.: Provable robust watermarking  
 935 for AI-generated text. In: The Twelfth International Conference on Learning  
 936 Representations (2024).
- 937 [42] Wouters, B.: Optimizing watermarks for large language models. In: Forty-first  
 938 International Conference on Machine Learning (2024).

- 939 [43] Fernandez, P., Chaffin, A., Tit, K., Chappelier, V., Furon, T.: Three bricks  
940 to consolidate watermarks for large language models. 2023 IEEE International  
941 Workshop on Information Forensics and Security (WIFS) (2023).
- 942 [44] Zhu, Y., Lu, S., Zheng, L., Guo, J., Zhang, W., Wang, J., Yu, Y.: Texygen: A  
943 benchmarking platform for text generation models. In: The 41st International  
944 ACM SIGIR Conference on Research & Development in Information Retrieval,  
945 pp. 1097–1100 (2018).
- 946 [45] Aaronson, S.: Watermarking of LLMs. Lecture at [https://www.youtube.com/  
947 live/2Kx9jbSMZqA](https://www.youtube.com/live/2Kx9jbSMZqA) (2023).
- 948 [46] Glaese, A., McAleese, N., Trebacz, M., Aslanides, J., Firoiu, V., Ewalds, T.,  
949 Rauh, M., Weidinger, L., Chadwick, M.J., Thacker, P., Campbell-Gillingham, L.,  
950 Uesato, J., Huang, P., Comanescu, R., Yang, F., See, A., Dathathri, S., Greig, R.,  
951 Chen, C., Fritz, D., Elias, J.S., Green, R., Mokra, S., Fernando, N., Wu, B., Foley,  
952 R., Young, S., Gabriel, I., Isaac, W., Mellor, J., Hassabis, D., Kavukcuoglu, K.,  
953 Hendricks, L.A., Irving, G.: Improving alignment of dialogue agents via targeted  
954 human judgements. Preprint at <https://arxiv.org/abs/2209.14375> (2022).
- 955 [47] Chen, M., Tworek, J., Jun, H., Yuan, Q., Oliveira Pinto, H.P., Kaplan, J.,  
956 Edwards, H., Burda, Y., Joseph, N., Brockman, G., Ray, A., Puri, R., Krueger,  
957 G., Petrov, M., Khlaaf, H., Sastry, G., Mishkin, P., Chan, B., Gray, S., Ryder,  
958 N., Pavlov, M., Power, A., Kaiser, L., Bavarian, M., Winter, C., Tillet, P., Such,  
959 F.P., Cummings, D., Plappert, M., Chantzis, F., Barnes, E., Herbert-Voss, A.,  
960 Guss, W.H., Nichol, A., Paino, A., Tezak, N., Tang, J., Babuschkin, I., Bal-  
961 aji, S., Jain, S., Saunders, W., Hesse, C., Carr, A.N., Leike, J., Achiam, J.,  
962 Misra, V., Morikawa, E., Radford, A., Knight, M., Brundage, M., Murati, M.,  
963 Mayer, K., Welinder, P., McGrew, B., Amodei, D., McCandlish, S., Sutskever,  
964 I., Zaremba, W.: Evaluating large language models trained on code Preprint at  
965 <https://arxiv.org/abs/2107.03374> (2021).
- 966 [48] Austin, J., Odena, A., Nye, M.I., Bosma, M., Michalewski, H., Dohan, D., Jiang,  
967 E., Cai, C.J., Terry, M., Le, Q.V., Sutton, C.: Program synthesis with large  
968 language models. Preprint at <https://arxiv.org/abs/2108.07732> (2021).
- 969 [49] Hendrycks, D., Burns, C., Basart, S., Zou, A., Mazeika, M., Song, D., Steinhardt,  
970 J.: Measuring Massive Multitask Language Understanding. Proceedings of the  
971 International Conference on Learning Representations (2021).
- 972 [50] Cobbe, K., Kosaraju, V., Bavarian, M., Chen, M., Jun, H., Kaiser, L., Plappert,  
973 M., Tworek, J., Hilton, J., Nakano, R., Hesse, C., Schulman, J.: Training veri-  
974 fiers to solve math word problems. Preprint at <https://arxiv.org/abs/2110.14168>  
975 (2021).
- 976 [51] Hendrycks, D., Burns, C., Kadavath, S., Arora, A., Basart, S., Tang, E., Song, D.,  
977 Steinhardt, J.: Measuring mathematical problem solving with the MATH dataset.

- 978 Proceedings of the Neural Information Processing Systems Track on Datasets and  
979 Benchmarks, vol. 1 (2021).
- 980 [52] Zhong, W., Cui, R., Guo, Y., Liang, Y., Lu, S., Wang, Y., Saied, A., Chen, W.,  
981 Duan, N.: AGIEval: A Human-Centric Benchmark for Evaluating Foundation  
982 Models. Preprint at <https://arxiv.org/abs/2304.06364> (2023).
- 983 [53] Suzgun, M., Scales, N., Schärli, N., Gehrmann, S., Tay, Y., Chung, H.W.,  
984 Chowdhery, A., Le, Q., Chi, E., Zhou, D., Wei, J.: Challenging BIG-Bench  
985 tasks and whether chain-of-thought can solve them. In: Findings of the Association  
986 for Computational Linguistics: ACL 2023, pp. 13003–13051. Association for  
987 Computational Linguistics, Toronto, Canada (2023).
- 988 [54] Jelinek, F., Mercer, R.L., Bahl, L.R., Baker, J.K.: Perplexity—a measure of the  
989 difficulty of speech recognition tasks. *The Journal of the Acoustical Society of  
990 America* **62**(S1), 63–63 (1977).
- 991 [55] Almazrouei, E., Alobeidli, H., Alshamsi, A., Cappelli, A., Cojocaru, R., Deb-  
992 bah, M., Goffinet, E., Heslow, D., Launay, J., Malartic, Q., Noune, B., Pannier,  
993 B., Penedo, G.: Falcon-40B: an open large language model with state-of-the-art  
994 performance. Preprint at <https://arxiv.org/abs/2311.16867> (2023).
- 995 [56] Hasan, T., Bhattacharjee, A., Islam, M.S., Mubasshir, K., Li, Y.-F., Kang, Y.-B.,  
996 Rahman, M.S., Shahriyar, R.: XL-Sum: Large-scale multilingual abstractive sum-  
997 marization for 44 languages. In: Findings of the Association for Computational  
998 Linguistics: ACL-IJCNLP 2021, pp. 4693–4703. Association for Computational  
999 Linguistics, (2021).
- 1000 [57] Shaffer, J.P.: Multiple hypothesis testing. *Annual review of psychology* **46**(1),  
1001 561–584 (1995).
